# Supplementary material for: An organocatalytic C–C bond cleavage approach: a metal-free and peroxide-free facile method for the synthesis of amide derivatives
Source: Royal Society of Chemistry journal article supplement (doi:10.1039/d0nj04158k), 2020-01-01
Supplement: d0nj04158k1.pdf [file d0nj04158k1.pdf]

## Supporting Information

### Organocatalytic C-C Bond Cleavage Approach: A Metal-Free and Peroxide-Free Facile Method for the Synthesis of Amide Derivatives

Nagaraju Vodnala,<sup>a</sup> Raghuram Gujjaraappa,<sup>a</sup> Saibabu Polina,<sup>b</sup> Vanaparthi Satheesh,<sup>c</sup> Dhananjaya Kaldhi,<sup>a</sup> Arup K. Kabi<sup>a</sup> and Chandi C. Malakar<sup>\*a</sup>

<sup>a</sup> Department of Chemistry, National Institute of Technology Manipur, Imphal - 795004, Manipur, India.

E-mail: [cmalakar@nitmanipur.ac.in](mailto:cmalakar@nitmanipur.ac.in).

<sup>b</sup> Department of Chemistry, CHRIST (Deemed to be University), Bangalore - 560029, India.

<sup>c</sup> Schulich Faculty of Chemistry, Technion-Israel Institute of Technology, Haifa - 3200003, Israel.

---

| Contents:                                                                           | pages |
|-------------------------------------------------------------------------------------|-------|
| 1. General methods                                                                  | 2     |
| 2. Investigation of the reaction mechanism via mass spectrometry                    | 3     |
| 3. General experimental procedure for the synthesis of anilides <b>3a-w</b>         | 4     |
| 4. Experimental procedures and analytical data of synthesized compounds <b>3a-w</b> | 4     |
| 5. NMR spectral data                                                                | 13    |
| 6. References                                                                       | 38    |

## 1. General methods

All starting materials were purchased from commercial suppliers (Sigma-Aldrich, Alfa-Aesar, SD fine chemicals, Merck, HI Media, Fisher Scientific) and were used without further purification unless otherwise indicated. All reactions were performed in a 10 mL reaction vial with magnetic stirring. Solvents used in extraction and purification were distilled prior to use. Thin-layer chromatography (TLC) was performed on TLC plates purchase from Merck. Compounds were visualized with UV light ( $\lambda = 254$  nm) and/or by immersion in  $\text{KMnO}_4$  staining solution followed by heating. Products were purified by column chromatography on silica gel, 100 - 200 mesh. Melting points were determined in open capillary tubes on EZ-Melt automated melting point apparatus and are uncorrected. All HRMS are recorded in EI-QTOF method and LC-MS are recorded in APCI method in acetonitrile solvent.  $^1\text{H}$  ( $^{13}\text{C}$ ) NMR spectra were recorded at 600 (150) MHz and 400 (100) MHz on a Bruker spectrometer using  $\text{CDCl}_3$  and  $\text{DMSO-d}_6$  as a solvent. The  $^1\text{H}$  and  $^{13}\text{C}$  chemical shifts were referenced to residual solvent signals at  $\delta_{\text{H/C}}$  7.26 /77.28 ( $\text{CDCl}_3$ ) and  $\delta_{\text{H/C}}$  2.51 /39.50 ( $\text{DMSO-d}_6$ ) relative to TMS as internal standards. Coupling constants  $J$  [Hz] were directly taken from the spectra and are not averaged. Splitting patterns are designated as s (singlet), d (doublet), t (triplet), q (quartet), m (multiplet), overlapped and br (broad).

## 2. Investigation of the reaction mechanism *via* mass spectrometry

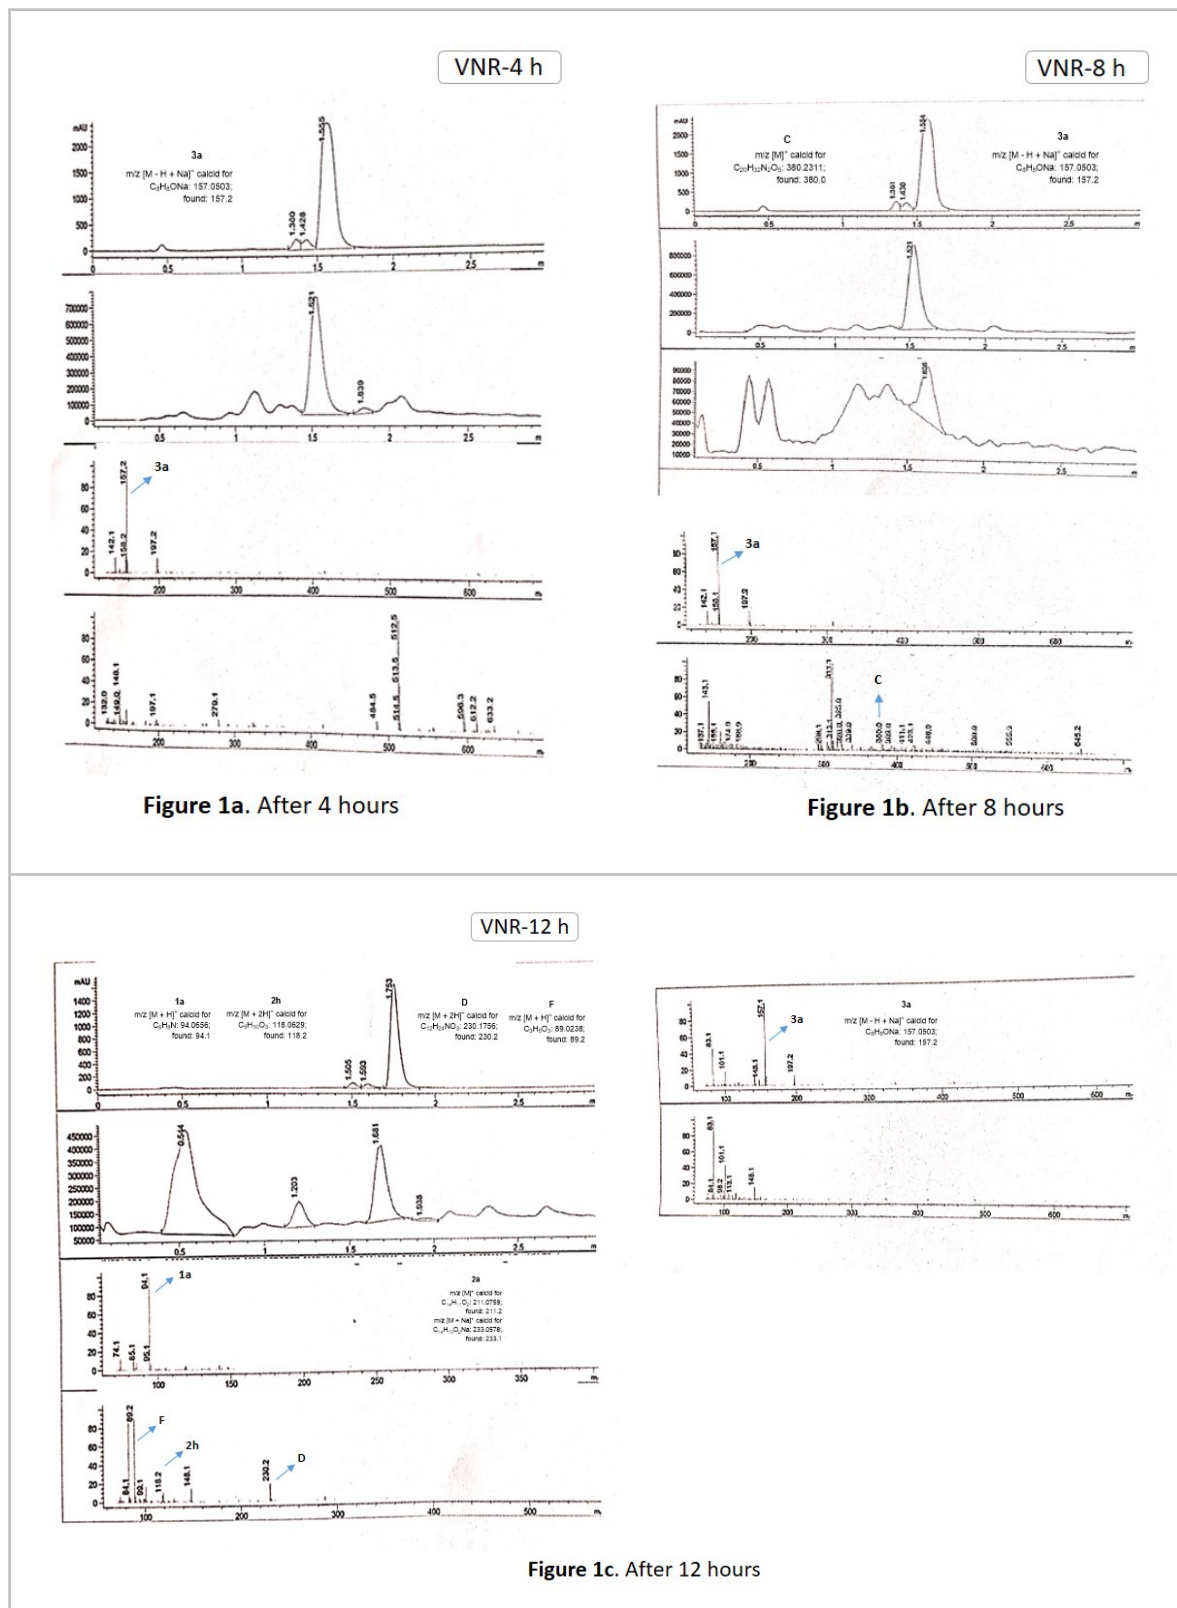

**Figure 1.** Investigation of the reaction mechanism *via* Mass Spectrometry

### 3. General experimental procedure for the synthesis of anilides **3a-w**

A 10 mL reaction vial was charged with amines **1a-w** (1.0 mmol), 1,3-diketones **2a-e, h-j** (1.2 mmol), TEMPO (2,2,6,6-tetramethylpiperidin-1-yl)oxyl) (0.1 mmol, 15.6 mg), NaO<sup>t</sup>Bu (2.0 mmol, 192 mg) and toluene (2.0 mL). The reaction vial was then heated at 100 °C for 16 h under air. After completion of the reaction (progress was monitored by TLC; SiO<sub>2</sub>, Hexane/EtOAc = 7:3), the mixture was diluted with ethyl acetate (15 mL) and water (20 mL) and extracted with ethyl acetate (3 × 10 mL). The combined organic layer was washed with brine (3 × 10 mL) and dried over anhydrous Na<sub>2</sub>SO<sub>4</sub>. Solvent was removed under reduced pressure and the remaining residue was purified by column chromatography over silica gel using hexane / ethyl acetate = 7:3 as an eluent to obtain the desired products **3a-w** in moderate to good yields.

### 4. Experimental procedures and analytical data of synthesized compounds **3a-w**

**Synthesis of Acetanilide (3a)**; According to the general procedure, reaction between aniline (**1a**) (1.0 mmol, 93 mg) and acetylacetone (**2a**) (1.2 mmol, 120 mg) were performed using 10 mol% TEMPO (15.6 mg) and NaO<sup>t</sup>Bu (2.0 mmol, 192 mg) to obtain the desired acetanilide (**3a**) in 85% (115 mg, Table 1) yield as white solid.

**Acetanilide (3a)**<sup>1</sup>; **White solid**; R<sub>f</sub> = 0.30 (SiO<sub>2</sub>, Hexane/EtOAc = 7:3); **m.p** = 110-112 °C (Lit<sup>1</sup> 111-113 °C); **<sup>1</sup>H NMR** (600 MHz, CDCl<sub>3</sub>): δ = 7.53 (brs, 1H; NH), 7.50 (d, <sup>3</sup>J = 9.0 Hz, 2H; 5-H and 9-H), 7.30 (t, <sup>3</sup>J = 8.8 Hz, 2H; 6-H and 8-H), 7.10 (t, <sup>3</sup>J = 6.8 Hz, 1H; 7-H), 2.16 (s, 3H; 1-H) ppm; **<sup>13</sup>C NMR** (150 MHz, CDCl<sub>3</sub>): δ = 168.48 (C-2), 137.94 (C-4), 129.0 (C-8 and C-6), 124.32 (C-5 and C-9), 119.95 (C-7), 24.6 (C-1) ppm; **HRMS** (EI-QTOF, [M+H]<sup>+</sup>) calculated for C<sub>8</sub>H<sub>10</sub>NO: 136.0762; found: 136.0764.

**Synthesis of N-(4-methylphenyl)acetamide (3b)**; According to the general procedure, reaction between *p*-toluidine (**1b**) (1.0 mmol, 107 mg) and acetylacetone (**2a**) (1.2 mmol, 120 mg) were performed using 10 mol% TEMPO (15.6 mg) and NaO<sup>t</sup>Bu (2.0 mmol, 192 mg) to obtain the desired *N*-(4-methylphenyl)acetamide (**3b**) in 85% (127 mg, Scheme 2) yield as colorless solid.

**N-(4-methylphenyl)acetamide (3b)**<sup>1</sup>; **Colorless solid**; R<sub>f</sub> = 0.30 (SiO<sub>2</sub>, Hexane/EtOAc = 7:3); **m.p** = 148-149 °C (Lit<sup>1</sup> 148-150 °C); **<sup>1</sup>H NMR** (600 MHz, CDCl<sub>3</sub>) δ = 7.37 (d, <sup>3</sup>J = 9.0 Hz, 2H; 5-H and 9-H), 7.29 (brs, 1H; NH), 7.11 (d, <sup>3</sup>J = 6.8 Hz, 2H; 6-H and 8-H), 2.31 (s, 3H; 10-H),

2.15 (s, 3H; 1-H) ppm;  $^{13}\text{C}$  NMR (150 MHz,  $\text{CDCl}_3$ )  $\delta$  = 168.21 (C-2), 135.32 (C-7), 133.92 (C-4), 129.46 (C-6 and C-8), 120.0 (C-5 and C-9), 24.53 (C-1), 20.85 (C-10) ppm; HRMS (EI-QTOF,  $[\text{M}+\text{H}]^+$ ) calculated for  $\text{C}_9\text{H}_{12}\text{NO}$ : 150.0919; found: 150.0916.

**Synthesis of *N*-(4-isopropylphenyl)acetamide (3c)**; According to the general procedure, reaction between 4-isopropylaniline (**1c**) (1.0 mmol, 135 mg) and acetylacetone (**2a**) (1.2 mmol, 120 mg) were performed using 10 mol% TEMPO (15.6 mg) and NaO<sup>t</sup>Bu (2.0 mmol, 192 mg) to obtain the desired *N*-(4-isopropylphenyl)acetamide (**3c**) in 82% (146 mg, Scheme 2) yield as colorless solid.

***N*-(4-isopropylphenyl)acetamide (3c)<sup>1</sup>**; Colorless solid;  $R_f$  = 0.30 ( $\text{SiO}_2$ , Hexane/EtOAc = 7:3); m.p = 105-107 °C (Lit<sup>1</sup> 104-106 °C);  $^1\text{H}$  NMR (400 MHz,  $\text{CDCl}_3$ )  $\delta$  = 7.54 (brs, 1H; NH), 7.40 (d,  $^3J$  = 8.0 Hz, 2H; 5-H and 9-H), 7.16 (d,  $^3J$  = 8.0 Hz, 2H; 6-H and 8-H), 2.81-2.92 (m, 1H; 10-H), 2.14 (s, 3H; 1-H), 1.22 (d,  $^3J$  = 8.0 Hz, 6H; 11-H) ppm;  $^{13}\text{C}$  NMR (100 MHz,  $\text{CDCl}_3$ )  $\delta$  = 168.49 (C-2), 145.03 (C-7), 135.58 (C-4), 126.84 (C-6 and C-8), 120.22 (C-5 and C-9), 33.59 (C-10), 24.46 (C-1), 24.03 (C-11) ppm; HRMS (EI-QTOF,  $[\text{M}+\text{H}]^+$ ) calculated for  $\text{C}_{11}\text{H}_{16}\text{NO}$ : 178.1232; found: 178.1228.

**Synthesis of *N*-(4-methoxyphenyl)acetamide (3d)**; According to the general procedure, reaction between *p*-anisidine (**1d**) (1.0 mmol, 123 mg) and acetylacetone (**2a**) (1.2 mmol, 120 mg) were performed using 10 mol% TEMPO (15.6 mg) and NaO<sup>t</sup>Bu (2.0 mmol, 192 mg) to obtain the desired *N*-(4-methoxyphenyl)acetamide (**3d**) in 79% (130 mg, Scheme 2) yield as colorless solid.

***N*-(4-methoxyphenyl)acetamide (3d)<sup>1</sup>**; Colorless solid;  $R_f$  = 0.30 ( $\text{SiO}_2$ , Hexane/EtOAc = 7:3); m.p = 128-130 °C (Lit<sup>1</sup> 127-129 °C);  $^1\text{H}$  NMR (400 MHz,  $\text{CDCl}_3$ )  $\delta$  = 7.38 (d,  $^3J$  = 8.0 Hz, 2H; 5-H and 9-H), 7.27 (brs, 1H; NH), 6.84 (d,  $^3J$  = 9.0 Hz, 2H; 6-H and 8-H), 3.78 (s, 3H; 10-H), 2.14 (s, 3H; 1-H) ppm;  $^{13}\text{C}$  NMR (100 MHz,  $\text{CDCl}_3$ )  $\delta$  = 168.29 (C-2), 156.45 (C-7), 130.93 (C-4), 121.96 (C-5 and C-9), 114.13 (C-6 and C-8), 55.49 (C-10), 24.36 (C-1) ppm; HRMS (EI-QTOF,  $[\text{M}+\text{H}]^+$ ) calculated for  $\text{C}_9\text{H}_{12}\text{NO}_2$ : 166.0868; found: 166.0863.

**Synthesis of *N*-(3,4-dimethylphenyl)acetamide (3e)**; According to the general procedure, reaction between 3,4-dimethylaniline (**1e**) (1.0 mmol, 121 mg) and acetylacetone (**2a**) (1.2 mmol, 120 mg) were performed using 10 mol% TEMPO (15.6 mg) and NaO<sup>t</sup>Bu (2.0 mmol,

192 mg) to obtain the desired *N*-(3,4-dimethylphenyl)acetamide (**3e**) in 78% (127 mg, Scheme 2) yield as pale yellow solid.

***N*-(3,4-dimethylphenyl)acetamide (3e)**<sup>1</sup>; **Pale yellow solid**;  $R_f = 0.30$  (SiO<sub>2</sub>, Hexane/EtOAc = 7:3); **<sup>1</sup>H NMR** (600 MHz, CDCl<sub>3</sub>)  $\delta = 7.48$  (s, 1H; 5-H), 7.35 (d, <sup>3</sup>*J* = 6.8 Hz, 1H; 9-H), 7.26 (brs, 1H; NH), 7.14 (d, <sup>3</sup>*J* = 6.8 Hz, 1H; 8-H), 2.30 (s, 3H; 10-H), 2.28 (s, 3H; 11-H), 2.21 (s, 3H; 1-H) ppm; **HRMS** (EI-QTOF, [M+H]<sup>+</sup>) calculated for C<sub>10</sub>H<sub>14</sub>NO: 164.1075; found: 164.1069.

**Synthesis of *N*-(4-methoxy-2-methylphenyl)acetamide (3f)**; According to the general procedure, reaction between 4-methoxy-2-methylaniline (**1f**) (1.0 mmol, 137 mg) and acetylacetone (**2a**) (1.2 mmol, 120 mg) were performed using 10 mol% TEMPO (15.6 mg) and NaO<sup>t</sup>Bu (2.0 mmol, 192 mg) to obtain the desired *N*-(4-methoxy-2-methylphenyl)acetamide (**3f**) in 71% (127 mg, Scheme 2) yield as colorless solid.

***N*-(4-methoxy-2-methylphenyl)acetamide (3f)**<sup>1</sup>; **Colorless solid**;  $R_f = 0.25$  (SiO<sub>2</sub>, Hexane/EtOAc = 7:3); **m.p** = 128-129 °C (Lit<sup>1</sup> 126-129 °C); **<sup>1</sup>H NMR** (400 MHz, CDCl<sub>3</sub>)  $\delta = 7.40$  (d, <sup>3</sup>*J* = 8.0 Hz, 1H; 9-H), 7.03 (brs, 1H; NH), 6.72-6.70 (m, 2H; 6-H and 8-H), 3.76 (s, 3H; 11-H), 2.21 (s, 3H; 10-H), 2.16 (s, 3H; 1-H) ppm; **<sup>13</sup>C NMR** (100 MHz, CDCl<sub>3</sub>)  $\delta = 168.83$  (C-2), 157.47 (C-7), 133.08 (C-5), 128.46 (C-4), 126.22 (C-6), 115.92 (C-8), 111.57 (C-9), 55.39 (C-11), 23.84 (C-1), 18.15 (C-10) ppm; **HRMS** (EI-QTOF, [M+H]<sup>+</sup>) calculated for C<sub>10</sub>H<sub>14</sub>NO<sub>2</sub>: 180.1025; found: 180.1020.

**Synthesis of *N*-(3-chlorophenyl)acetamide (3g)**; According to the general procedure, reaction between 3-chloroaniline (**1g**) (1.0 mmol, 127.56 mg) and acetylacetone (**2a**) (1.2 mmol, 120 mg) were performed using 10 mol% TEMPO (15.6 mg) and NaO<sup>t</sup>Bu (2.0 mmol, 192 mg) to obtain the desired *N*-(3-chlorophenyl)acetamide (**3g**) in 75% (127 mg, Scheme 2) yield as pale yellow solid.

***N*-(3-chlorophenyl)acetamide (3g)**<sup>1</sup>; **Pale yellow solid**;  $R_f = 0.30$  (SiO<sub>2</sub>, Hexane/EtOAc = 7:3); **m.p** = 76-77 °C (Lit<sup>1</sup> 75-78 °C); **<sup>1</sup>H NMR** (600 MHz, CDCl<sub>3</sub>)  $\delta = 7.62$  (s, 1H; 5-H), 7.45 (s, 1H; NH), 7.34 (dd, <sup>3</sup>*J* = 6.8 Hz, 1H; 9-H), 7.22 (t, <sup>3</sup>*J* = 8 Hz, 1H; 8-H), 7.06 (dd, <sup>3</sup>*J* = 6.8 Hz, 1H; 7-H), 2.18 (s, 3H; 1-H) ppm; **<sup>13</sup>C NMR** (150 MHz, CDCl<sub>3</sub>)  $\delta = 168.41$  (C-2), 139.03 (C-4), 134.6 (C-6), 129.95 (C-8), 124.29 (C-7), 119.87 (C-5), 117.71 (C-9), 24.62 (C-1) ppm; **HRMS** (EI-QTOF, [M+H]<sup>+</sup>) calculated for C<sub>8</sub>H<sub>7</sub>ClNO: 170.0372; found: 170.0368.

**Synthesis of *N*-(4-chlorophenyl)acetamide (3h)**; According to the general procedure, reaction between 4-chloroaniline (**1h**) (1.0 mmol, 127.56 mg) and acetylacetone (**2a**) (1.2 mmol, 120 mg) were performed using 10 mol% TEMPO (15.6 mg) and NaO<sup>t</sup>Bu (2.0 mmol, 192 mg) to obtain the desired *N*-(4-chlorophenyl)acetamide (**3h**) in 77% (131 mg, Scheme 2) yield as brown solid.

***N*-(4-chlorophenyl)acetamide (3h)<sup>1</sup>**; **Brown solid**;  $R_f = 0.30$  (SiO<sub>2</sub>, Hexane/EtOAc = 70:30); **m.p** = 175-176 °C (Lit<sup>1</sup> 174-177 °C); **<sup>1</sup>H NMR** (400 MHz, CDCl<sub>3</sub>)  $\delta = 7.47$  (d, <sup>3</sup> $J = 8$  Hz, 2H; 5-H and 9-H), 7.35 (s, 1H; NH), 7.29 (d, <sup>3</sup> $J = 8$  Hz, 2H; 6-H and 8-H), 2.19 (s, 3H; 1-H) ppm; **<sup>13</sup>C NMR** (100 MHz, CDCl<sub>3</sub>)  $\delta = 168.34$  (C-2), 136.42 (C-4), 129.29 (C-7), 129.01 (C-6 and C-8), 121.08 (C-5 and C-9), 24.57 (C-1) ppm; **HRMS** (EI-QTOF, [M+H]<sup>+</sup>) calculated for C<sub>8</sub>H<sub>9</sub>ClNO: 170.0372; found: 170.0369.

**Synthesis of *N*-(3,5-dichlorophenyl)acetamide (3i)**; According to the general procedure, reaction between 3,5-dichloroaniline (**1i**) (1.0 mmol, 162 mg) and acetylacetone (**2a**) (1.2 mmol, 120 mg) were performed using 10 mol% TEMPO (15.6 mg) and NaO<sup>t</sup>Bu (2.0 mmol, 192 mg) to obtain the desired *N*-(3,5-dichlorophenyl)acetamide (**3i**) in 74% (151 mg, Scheme 2) yield as pale brown solid.

***N*-(3,5-dichlorophenyl)acetamide (3i)<sup>2</sup>**; **Pale brown solid**;  $R_f = 0.34$  (SiO<sub>2</sub>, Hexane/EtOAc = 7:3); **m.p** = 188-190 °C (Lit<sup>2</sup> 189.1-189.4 °C); **<sup>1</sup>H NMR** (400 MHz, CDCl<sub>3</sub>)  $\delta = 7.98$  (s, 1H; NH), 7.49 (s, 1H; 7-H), 7.11 (s, 2H; 5-H and 9-H), 2.20 (s, 3H; 1-H), ppm; **HRMS** (EI-QTOF, [M+H]<sup>+</sup>) calculated for C<sub>8</sub>H<sub>8</sub>Cl<sub>2</sub>NO: 203.9982; found: 203.9978.

**Synthesis of *N*-(2-bromo-4-chlorophenyl)acetamide (3j)**; According to the general procedure, reaction between 2-bromo-4-chloroaniline (**1j**) (1.0 mmol, 206.47 mg) and acetylacetone (**2a**) (1.2 mmol, 120 mg) were performed using 10 mol% TEMPO (15.6 mg) and NaO<sup>t</sup>Bu (2.0 mmol, 192 mg) to obtain the desired *N*-(2-bromo-4-chlorophenyl)acetamide (**3j**) in 76% (189 mg, Scheme 2) yield as colorless solid.

***N*-(2-bromo-4-chlorophenyl)acetamide (3j)<sup>1</sup>**; **Colorless solid**;  $R_f = 0.35$  (SiO<sub>2</sub>, Hexane/EtOAc = 7:3); **m.p** = 105-107 °C (Lit<sup>1</sup> 104-106 °C); **<sup>1</sup>H NMR** (400 MHz, CDCl<sub>3</sub>)  $\delta = 8.29$  (d, <sup>3</sup> $J = 8.0$  Hz, 1H; 9-H), 7.56 (br s, 1H; NH), 7.53 (s, 1H; 6-H), 7.28 (dd, <sup>3</sup> $J = 8.0$  Hz, 1H; 8-H), 2.23 (s, 3H; 1-H) ppm; **<sup>13</sup>C NMR** (100 MHz, CDCl<sub>3</sub>)  $\delta = 168.26$  (C-2), 134.49 (C-4), 131.68 (C-6 and C-7), 128.51 (C-8 and C-9), 122.52 (C-5), 24.86 (C-1) ppm; **HRMS** (EI-QTOF, [M+H]<sup>+</sup>) calculated for C<sub>8</sub>H<sub>8</sub>BrClNO: 247.9477; found: 247.9474.

**Synthesis of *N*-(3-bromophenyl)acetamide (3k);** According to the general procedure, reaction between 3-bromoaniline (**1k**) (1.0 mmol, 172 mg) and acetylacetone (**2a**) (1.2 mmol, 120 mg) were performed using 10 mol% TEMPO (15.6 mg) and NaO<sup>t</sup>Bu (2.0 mmol, 192 mg) to obtain the desired *N*-(3-bromophenyl)acetamide (**3k**) in 68% (146 mg, Scheme 2) yield as white solid.

***N*-(3-bromophenyl)acetamide (3k)<sup>3</sup>; White solid;**  $R_f = 0.30$  (SiO<sub>2</sub>, Hexane/EtOAc = 7:3); **m.p** = 69-71 °C (Lit<sup>3</sup> 68-70 °C); **<sup>1</sup>H NMR** (400 MHz, CDCl<sub>3</sub>)  $\delta = 7.62$  (s, 2H; 5-H and NH), 7.35 (d, <sup>3</sup> $J = 8.0$  Hz, 1H; 7-H), 7.21 (t, <sup>3</sup> $J = 8.0$  Hz, 1H; 8-H), 7.06 (d, <sup>3</sup> $J = 8.0$  Hz, 1H; 9-H), 2.17 (s, 3H; 1-H) ppm; **<sup>13</sup>C NMR** (100 MHz, CDCl<sub>3</sub>)  $\delta = 168.59$  (C-2), 139.09 (C-4), 134.57 (C-8), 129.95 (C-7), 124.27 (C-6), 119.9 (C-5), 117.77 (C-9), 24.57 (C-1) ppm; **HRMS** (EI-QTOF, [M+H]<sup>+</sup>) calculated for C<sub>8</sub>H<sub>9</sub>BrNO: 213.9867; found: 213.9864.

**Synthesis of *N*-(4-bromophenyl)acetamide (3l);** According to the general procedure, reaction between 4-bromoaniline (**1l**) (1.0 mmol, 172 mg) and acetylacetone (**2a**) (1.2 mmol, 120 mg) were performed using 10 mol% TEMPO (15.6 mg) and NaO<sup>t</sup>Bu (2.0 mmol, 192 mg) to obtain the desired *N*-(4-bromophenyl)acetamide (**3l**) in 70% (150 mg, Scheme 2) yield as yellowish brown solid.

***N*-(4-bromophenyl)acetamide (3l)<sup>1</sup>; Yellowish brown solid;**  $R_f = 0.30$  (SiO<sub>2</sub>, Hexane/EtOAc = 7:3); **m.p** = 169-171 °C (Lit<sup>1</sup> 168-171 °C); **<sup>1</sup>H NMR** (400 MHz, CDCl<sub>3</sub>)  $\delta = 7.38$ -7.43 (m, 4H; 5-H, 6-H, 8-H and 9-H), 7.32 (s, 1H; NH), 2.17 (s, 3H; 1-H) ppm; **<sup>13</sup>C NMR** (100 MHz, CDCl<sub>3</sub>)  $\delta = 168.35$  (C-2), 136.94 (C-4), 131.97 (C-6 & C-8), 121.39 (C-5 & C-9), 116.69 (C-7), 24.61 (C-1) ppm; **HRMS** (EI-QTOF, [M+H]<sup>+</sup>) calculated for C<sub>8</sub>H<sub>9</sub>BrNO: 213.9867; found: 213.9865.

**Synthesis of *N*-(2-bromo-5-methylphenyl)acetamide (3m);** According to the general procedure, reaction between 2-bromo-5-methylaniline (**1m**) (1.0 mmol, 186 mg) and acetylacetone (**2a**) (1.2 mmol, 120 mg) were performed using 10 mol% TEMPO (15.6 mg) and NaO<sup>t</sup>Bu (2.0 mmol, 192 mg) to obtain the desired *N*-(2-bromo-5-methylphenyl)acetamide (**3m**) in 73% (166 mg, Scheme 2) yield as white solid.

***N*-(2-bromo-5-methylphenyl)acetamide (3m)<sup>1</sup>; White solid;**  $R_f = 0.30$  (SiO<sub>2</sub>, Hexane/EtOAc = 7:3); **m.p** = 96-98 °C (Lit<sup>1</sup> 97-99 °C); **<sup>1</sup>H NMR** (400 MHz, CDCl<sub>3</sub>)  $\delta = 8.14$  (s, 1H; NH), 7.55 (s, 1H; 9-H), 7.38 (d, <sup>3</sup> $J = 8$  Hz, 1H; 6-H), 6.78 (d, <sup>3</sup> $J = 8$  Hz, 1H; 7-H), 2.31 (s, 3H; 11-H), 2.22 (s, 3H; 1-H) ppm; **<sup>13</sup>C NMR** (100 MHz, CDCl<sub>3</sub>)  $\delta = 168.24$  (C-2), 138.63 (C-4), 135.3 (C-



8), 131.74 (C-6), 126.12 (C-7), 122.57 (C-9), 110.0 (C-5), 24.87 (C-1), 21.31 (C-11) ppm; **HRMS** (EI-QTOF,  $[M+H]^+$ ) calculated for  $C_9H_{11}BrNO$ : 228.0024; found: 228.0020.

**Synthesis of *N*-(4-iodomophenyl)acetamide (3n)**; According to the general procedure, reaction between 4-iodoaniline (**1n**) (1.0 mmol, 219 mg) and acetylacetone (**2a**) (1.2 mmol, 120 mg) were performed using 10 mol% TEMPO (15.6 mg) and NaO<sup>t</sup>Bu (2.0 mmol, 192 mg) to obtain the desired *N*-(4-iodomophenyl)acetamide (**3n**) in 69% (180 mg, Scheme 2) yield as yellow solid.

***N*-(4-iodomophenyl)acetamide (3n)<sup>1</sup>**; **Yellow solid**;  $R_f = 0.30$  (SiO<sub>2</sub>, Hexane/EtOAc = 7:3); **m.p** = 173-174 °C (Lit<sup>1</sup> 172-174 °C); **<sup>1</sup>H NMR** (400 MHz, CDCl<sub>3</sub>)  $\delta = 7.61$  (d,  $^3J = 8.0$  Hz, 2H; 6-H and 8-H), 7.35 (s, 1H; NH), 7.29 (d,  $^3J = 8.0$  Hz, 2H; 5-H and 9-H), 2.17 (s, 3H; 1-H) ppm; **<sup>13</sup>C NMR** (100 MHz, CDCl<sub>3</sub>)  $\delta = 168.41$  (C-2), 137.93 (C-4), 137.66 (C-6 and C-8), 121.68 (C-5 and C-9), 87.49 (C-7), 24.68 (C-1) ppm; **HRMS** (EI-QTOF,  $[M+H]^+$ ) calculated for  $C_8H_9INO$ : 261.9728; found: 261.9723.

**Synthesis of *N*-(4-(trifluoromethyl)phenyl)acetamide (3o)**; According to the general procedure, reaction between 4-(trifluoromethyl)aniline (**1o**) (1.0 mmol, 161 mg) and acetylacetone (**2a**) (1.2 mmol, 120 mg) were performed using 10 mol% TEMPO (15.6 mg) and NaO<sup>t</sup>Bu (2.0 mmol, 192 mg) to obtain the desired *N*-(4-(trifluoromethyl)phenyl)acetamide (**3o**) in 65% (132 mg, Scheme 2) yield as white solid.

***N*-(4-(trifluoromethyl)phenyl)acetamide (3o)<sup>1</sup>**; **White solid**;  $R_f = 0.30$  (SiO<sub>2</sub>, Hexane/EtOAc = 7:3); **m.p** = 152-153 °C (Lit<sup>1</sup> 151-154 °C); **<sup>1</sup>H NMR** (400 MHz, CDCl<sub>3</sub>)  $\delta = 7.72$  (s, 1H; NH), 7.56 (d,  $^3J = 8.4$  Hz, 2H;), 7.64-7.54 (m, 4H; 5-H, 6-H and 8-H 9-H), 2.20 (s, 3H; 1-H) ppm; **<sup>13</sup>C NMR** (100 MHz, CDCl<sub>3</sub>)  $\delta = 168.80$  (C-2), 140.95 (C-4), 126.25 (q,  $J = 3.6$  Hz, C-6 and C-8), 126.22 (q,  $J = 32$  Hz, C-7), 122.70 (q,  $J = 270$  Hz, C-10), 119.38 (C-5 and C-9), 24.65 (C-1) ppm; **HRMS** (EI-QTOF,  $[M+H]^+$ ) calculated for  $C_9H_9F_3NO$ : 204.0636; found: 204.0632.

**Synthesis of *N*-(2-nitrophenyl)acetamide (3p)**; According to the general procedure, reaction between 2-nitroaniline (**1p**) (1.0 mmol, 138 mg) and acetylacetone (**2a**) (1.2 mmol, 120 mg) were performed using 10 mol% TEMPO (15.6 mg) and NaO<sup>t</sup>Bu (2.0 mmol, 192 mg) to obtain the desired *N*-(2-nitrophenyl)acetamide (**3p**) in 55% (99 mg, Scheme 2) yield as yellow solid.

***N*-(2-nitrophenyl)acetamide (3p)<sup>1</sup>**; **Yellow solid**;  $R_f = 0.30$  (SiO<sub>2</sub>, Hexane/EtOAc = 7:3); **m.p** = 91-93 °C (Lit<sup>1</sup> 90-92 °C); **<sup>1</sup>H NMR** (400 MHz, CDCl<sub>3</sub>)  $\delta = 10.31$  (s, 1H; NH), 8.75 (d,  $^3J = 8$

Hz, 1H; 9-H), 8.20 (dd,  $^3J = 8$  Hz, 1H; 6-H), 7.63 (td,  $^3J = 8$  Hz, 1H; 8-H), 7.17 (t,  $^3J = 8$  Hz, 1H; 7-H), 2.29 (s, 3H; 1-H), ppm;  $^{13}\text{C NMR}$  (100 MHz,  $\text{CDCl}_3$ )  $\delta = 169.07$  (C-2), 136.33 (C-5), 135.97 (C-4), 134.85 (C-8), 125.71 (C-6), 123.22 (C-7), 122.21 (C-9), 25.67 (C-1) ppm; **HRMS** (EI-QTOF,  $[\text{M}+\text{H}]^+$ ) calculated for  $\text{C}_8\text{H}_9\text{N}_2\text{O}_3$ : 181.0613; found: 181.0609.

**Synthesis of *N*-(4-nitrophenyl)acetamide (3q)**; According to the general procedure, reaction between 4-nitroaniline (**1q**) (1.0 mmol, 138 mg) and acetylacetone (**2a**) (1.2 mmol, 120 mg) were performed using 10 mol% TEMPO (15.6 mg) and NaO<sup>t</sup>Bu (2.0 mmol, 192 mg) to obtain the desired *N*-(4-nitrophenyl)acetamide (**3q**) in 50% (90 mg, Scheme 2) yield as yellow solid.

***N*-(4-nitrophenyl)acetamide (3q)<sup>1</sup>**; **Yellow solid**;  $R_f = 0.30$  ( $\text{SiO}_2$ , Hexane/EtOAc = 7:3); **m.p** = 145-147 °C (Lit<sup>1</sup> 146-147 °C);  $^1\text{H NMR}$  (400 MHz,  $\text{CDCl}_3$ )  $\delta = 8.20$  (d,  $^3J = 8$  Hz, 2H; 6-H and 8-H), 7.76 (brs, 1H; NH), 7.70 (d,  $^3J = 8$  Hz, 2H; 5-H and 9-H), 2.23 (s, 3H; 1-H) ppm; **HRMS** (EI-QTOF,  $[\text{M}+\text{H}]^+$ ) calculated for  $\text{C}_8\text{H}_9\text{N}_2\text{O}_3$ : 181.0613; found: 181.0610.

**Synthesis of *N*-(4-chloro-2-nitrophenyl)acetamide (3r)**; According to the general procedure, reaction between 4-chloro-2-nitroaniline (**1r**) (1.0 mmol, 172.57 mg) and acetylacetone (**2a**) (1.2 mmol, 120 mg) were performed using 10 mol% TEMPO (15.6 mg) and NaO<sup>t</sup>Bu (2.0 mmol, 192 mg) to obtain the desired *N*-(4-chloro-2-nitrophenyl)acetamide (**3r**) in 58% (125 mg, Scheme 2) yield as yellow solid.

***N*-(4-chloro-2-nitrophenyl)acetamide (3r)<sup>1</sup>**; **Yellow solid**;  $R_f = 0.35$  ( $\text{SiO}_2$ , Hexane/EtOAc = 7:3); **m.p** = 96- 98 °C (Lit<sup>1</sup> 97-99 °C);  $^1\text{H NMR}$  (400 MHz,  $\text{CDCl}_3$ )  $\delta = 10.23$  (brs, 1H; NH), 8.76 (d,  $^3J = 8.6$  Hz, 1H; 9-H), 8.18 (d,  $^3J = 4$  Hz, 1H; 6-H), 7.59 (dd,  $^3J = 8$  Hz, 1H; 8-H), 2.29 (s, 3H; 1-H) ppm;  $^{13}\text{C NMR}$  (100 MHz,  $\text{CDCl}_3$ )  $\delta = 168.97$  (C-2), 136.38 (C-5), 135.9 (C-8), 133.52 (C-4), 128.36 (C-7), 125.3 (C-6), 123.41 (C-9), 25.59 (C-1) ppm; **HRMS** (EI-QTOF,  $[\text{M}+\text{H}]^+$ ) calculated for  $\text{C}_8\text{H}_8\text{ClN}_2\text{O}_3$ : 215.0223; found: 215.0218.

**Synthesis of 4-Acetamido-benzenesulfonamide (3s)**; According to the general procedure, reaction between sulfanilamide (**1s**) (1.0 mmol, 172 mg) and acetylacetone (**2a**) (1.2 mmol, 120 mg) were performed using 10 mol% TEMPO (15.6 mg) and NaO<sup>t</sup>Bu (2.0 mmol, 192 mg) to obtain the desired 4-acetamido-benzenesulfonamide (**3s**) in 56% (120 mg, Scheme 2) yield as white crystal.

**4-Acetamido-benzenesulfonamide (3s)**<sup>4</sup>; **White crystal**;  $R_f = 0.26$  (SiO<sub>2</sub>, CH<sub>2</sub>Cl<sub>2</sub>/MeOH = 9.5:0.5); **m.p** = 221-222 °C (Lit<sup>4</sup> 223-224 °C); **<sup>1</sup>H NMR** (400 MHz, DMSO-d<sub>6</sub>)  $\delta = 10.26$  (brs, 1H; NH), 7.72 (d, <sup>3</sup>*J* = 8.0 Hz, 4H; 5-H, 6-H, 8-H and 9-H), 7.23 (s, 2H; NH<sub>2</sub>), 2.08 (s, 3H; 1-H) ppm; **<sup>13</sup>C NMR** (100 MHz, DMSO-d<sub>6</sub>)  $\delta = 168.97$  (C-2), 142.2 (C-4), 138.07 (C-7), 126.68 (C-6 and C-8), 118.43 (C-5 and C-9), 24.12 (C-1) ppm; **HRMS** (EI-QTOF, [M+H]<sup>+</sup>) calculated for C<sub>8</sub>H<sub>11</sub>N<sub>2</sub>O<sub>3</sub>S: 215.0490; found: 215.0483.

**Synthesis of *N*-(2-hydroxyphenyl)acetamide (3t)**; According to the general procedure, reaction between 2-aminophenol (**1t**) (1.0 mmol, 109 mg) and acetylacetone (**2a**) (1.2 mmol, 120 mg) were performed using 10 mol% TEMPO (15.6 mg) and NaO<sup>t</sup>Bu (2.0 mmol, 192 mg) to obtain the desired *N*-(2-hydroxyphenyl)acetamide (**3t**) in 78% (118 mg, Scheme 2) yield as pale yellow solid.

***N*-(2-hydroxyphenyl)acetamide (3t)**<sup>5</sup>; **Pale yellow solid**;  $R_f = 0.4$  (SiO<sub>2</sub>, Hexane/EtOAc = 6:4); **m.p** = 217-218 °C (Lit<sup>5</sup> 218-220 °C); **<sup>1</sup>H NMR** (400 MHz, DMSO-d<sub>6</sub>)  $\delta = 9.75$  (brs, 1H; NH), 9.30 (brs, 1H; OH), 7.67 (d, <sup>3</sup>*J* = 8.0 Hz, 1H; 9-H), 6.93 (t, <sup>3</sup>*J* = 7.9 Hz, 1H; 7-H), 6.84 (d, <sup>3</sup>*J* = 8.0 Hz, 1H; 6-H), 6.75 (t, <sup>3</sup>*J* = 8.0 Hz, 1H; 8-H), 2.09 (s, 3H; 1-H) ppm; **<sup>13</sup>C NMR** (100 MHz, DMSO-d<sub>6</sub>)  $\delta = 169.49$  (C-2), 148.36 (C-5), 126.89 (C-4), 125.06 (C-7), 122.78 (C-8), 119.37 (C-9), 116.38 (C-6), 24.06 (C-1) ppm; **HRMS** (EI-QTOF, [M+H]<sup>+</sup>) calculated for C<sub>8</sub>H<sub>10</sub>NO<sub>2</sub>: 152.0711; found: 152.0708.

**Synthesis of *N*-methyl-*N*-phenylacetamide (3u)**; According to the general procedure, reaction between *N*-methylaniline (**1u**) (1.0 mmol, 107 mg) and acetylacetone (**2a**) (1.2 mmol, 120 mg) were performed using 10 mol% TEMPO (15.6 mg) and NaO<sup>t</sup>Bu (2.0 mmol, 192 mg) to obtain the desired *N*-methyl-*N*-phenylacetamide (**3u**) in 63% (94 mg, Scheme 2) yield as white solid.

***N*-methyl-*N*-phenylacetamide (3u)**<sup>6</sup>; **White solid**;  $R_f = 0.55$  (SiO<sub>2</sub>, Hexane/EtOAc = 7:3); **m.p** = 108-110 °C (Lit<sup>6</sup> 108-109 °C); **<sup>1</sup>H NMR** (400 MHz, DMSO-d<sub>6</sub>):  $\delta = 7.42$  (d, <sup>3</sup>*J* = 8.0 Hz, 2H; 5-H and 9-H), 7.32 (t, <sup>3</sup>*J* = 8.0 Hz, 3H; 6-H, 7-H and 8-H), 3.13 (s, 3H; 10-H), 1.74 (s, 3H; 1-H) ppm; **HRMS** (EI-QTOF, [M+H]<sup>+</sup>) calculated for C<sub>9</sub>H<sub>12</sub>NO: 150.0918; found: 150.0913.

**Synthesis of *N*-acetyl pyrrolidine: (3v)**; According to the general procedure, reaction between pyrrolidine (**1v**) (1.0 mmol, 71 mg) and acetylacetone (**2a**) (1.2 mmol, 120 mg) were performed using 10 mol% TEMPO (15.6 mg) and NaO<sup>t</sup>Bu (2.0 mmol, 192 mg) to obtain the desired *N*-acetyl pyrrolidine (**3v**) in 58% (66 mg, Scheme 2) yield as colorless liquid.

***N*-Acetyl pyrrolidine: (3v)**<sup>7</sup>; **Colorless liquid**;  $R_f = 0.2$  (SiO<sub>2</sub>, CH<sub>2</sub>Cl<sub>2</sub>/MeOH = 9.5:0.5); **<sup>1</sup>H NMR** (400 MHz, DMSO-d<sub>6</sub>):  $\delta = 3.47$ -3.40 (m, 4H; 4-H and 7-H), 2.05 (s, 3H; 1-H), 1.99-1.93 (m, 4H; 5-H and 9-H), 1.90-1.83 (m, 4H; 5-H and 6-H) ppm; **<sup>13</sup>C NMR** (100 MHz, DMSO-d<sub>6</sub>)  $\delta = 169.37$  (C-2), 47.49 (C-4), 45.62 (C-7), 26.17 (C-5), 24.66 (C-6), 22.53 (C-1) ppm; **HRMS** (EI-QTOF, [M+H]<sup>+</sup>) calculated for C<sub>6</sub>H<sub>12</sub>NO: 114.0918; found: 114.0912.

**Synthesis of *N*-acetylpiperidin-4-one: (3w)**; According to the general procedure, reaction between 4-piperidinone (**1w**) (1.0 mmol, 99 mg) and acetylacetone (**2a**) (1.2 mmol, 120 mg) were performed using 10 mol% TEMPO (15.6 mg) and NaO<sup>t</sup>Bu (2.0 mmol, 192 mg) to obtain the desired *N*-acetylpiperidin-4-one (**3w**) in 53% (75 mg, Scheme 2) yield as colorless liquid.

***N*-acetylpiperidin-4-one: (3w)**<sup>8</sup>; **Colorless liquid**;  $R_f = 0.2$  (SiO<sub>2</sub>, CH<sub>2</sub>Cl<sub>2</sub>/MeOH = 9.5:0.5); **<sup>1</sup>H NMR** (400 MHz, DMSO-d<sub>6</sub>):  $\delta = 3.87$  (t,  $J = 6.2$  Hz, 2H; 4-H), 3.75 (t,  $J = 6.2$  Hz, 2H; 8-H), 2.50-2.45 (m, 4H; 5-H and 9-H), 2.18 (s, 3H; 1-H) ppm; **<sup>13</sup>C NMR** (100 MHz, DMSO-d<sub>6</sub>)  $\delta = 206.84$  (C-6), 169.45 (C-2), 45.04 (C-4), 41.32 (C-8), 40.89 (C-5), 40.76 (C-7), 21.49 (C-1) ppm; **HRMS** (EI-QTOF, [M+H]<sup>+</sup>) calculated for C<sub>7</sub>H<sub>12</sub>NO<sub>2</sub>: 142.0868; found: 142.0864.

## 5. NMR spectral data

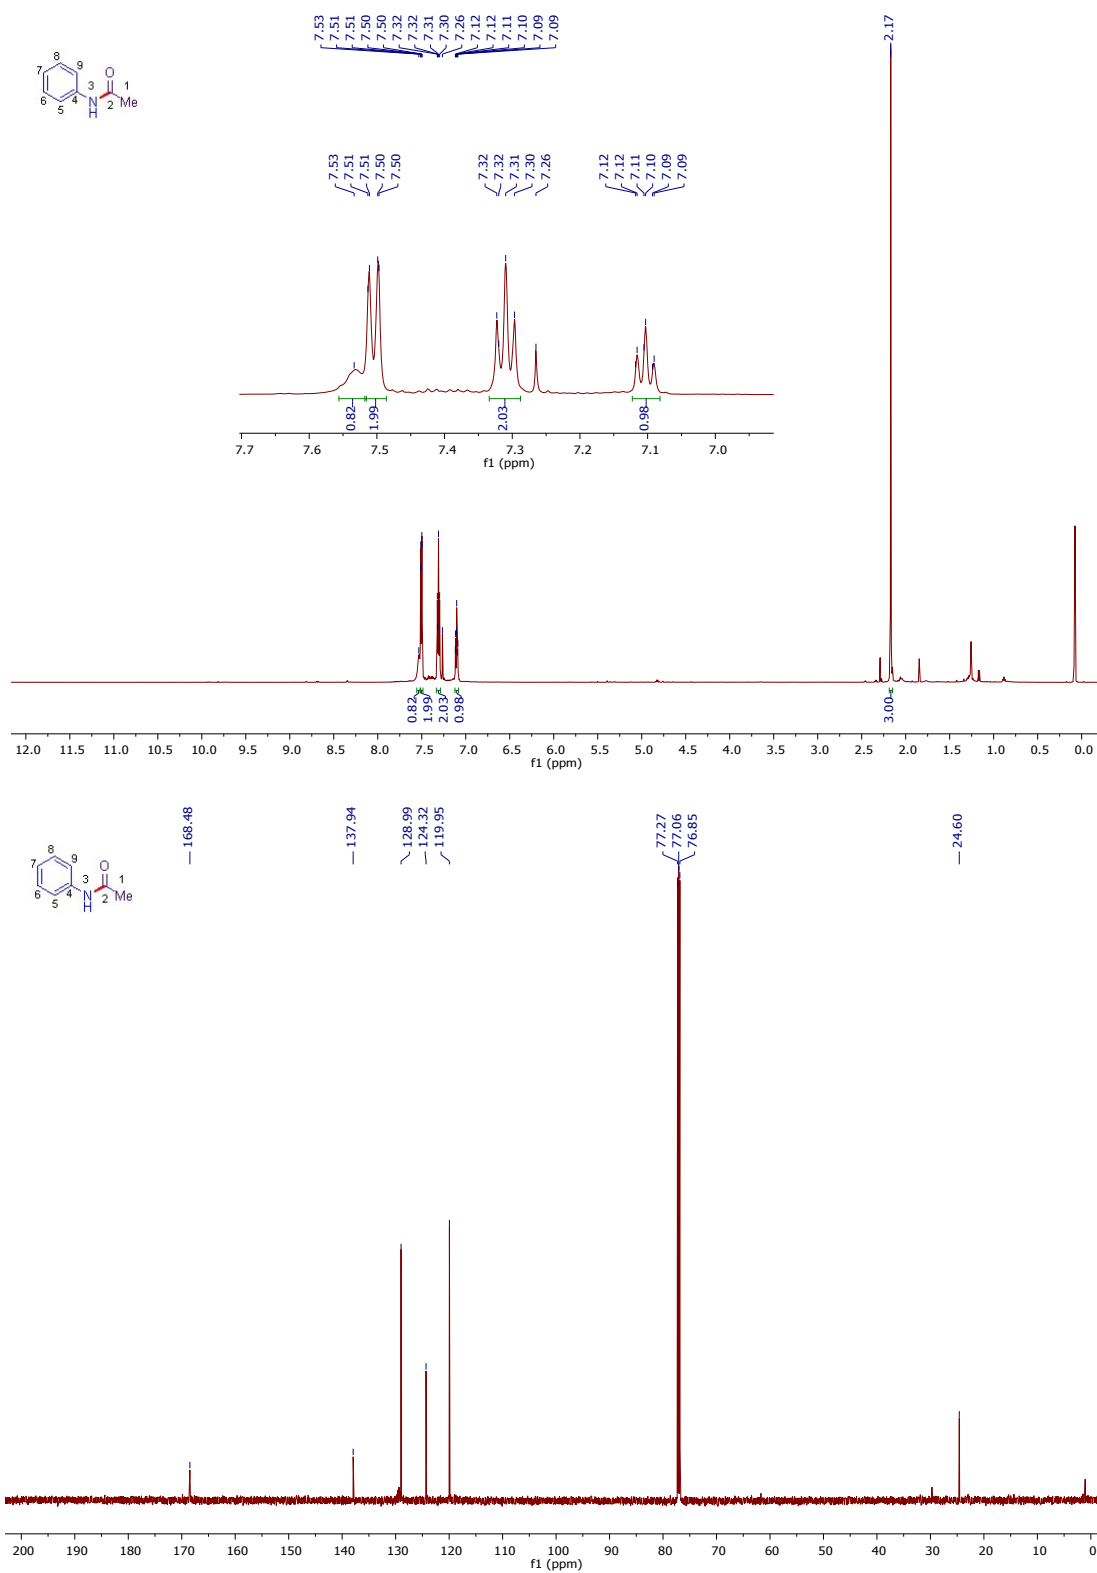

Figure 2. <sup>1</sup>H (600 MHz), <sup>13</sup>C (150 MHz) NMR spectra of 3a in CDCl<sub>3</sub>.

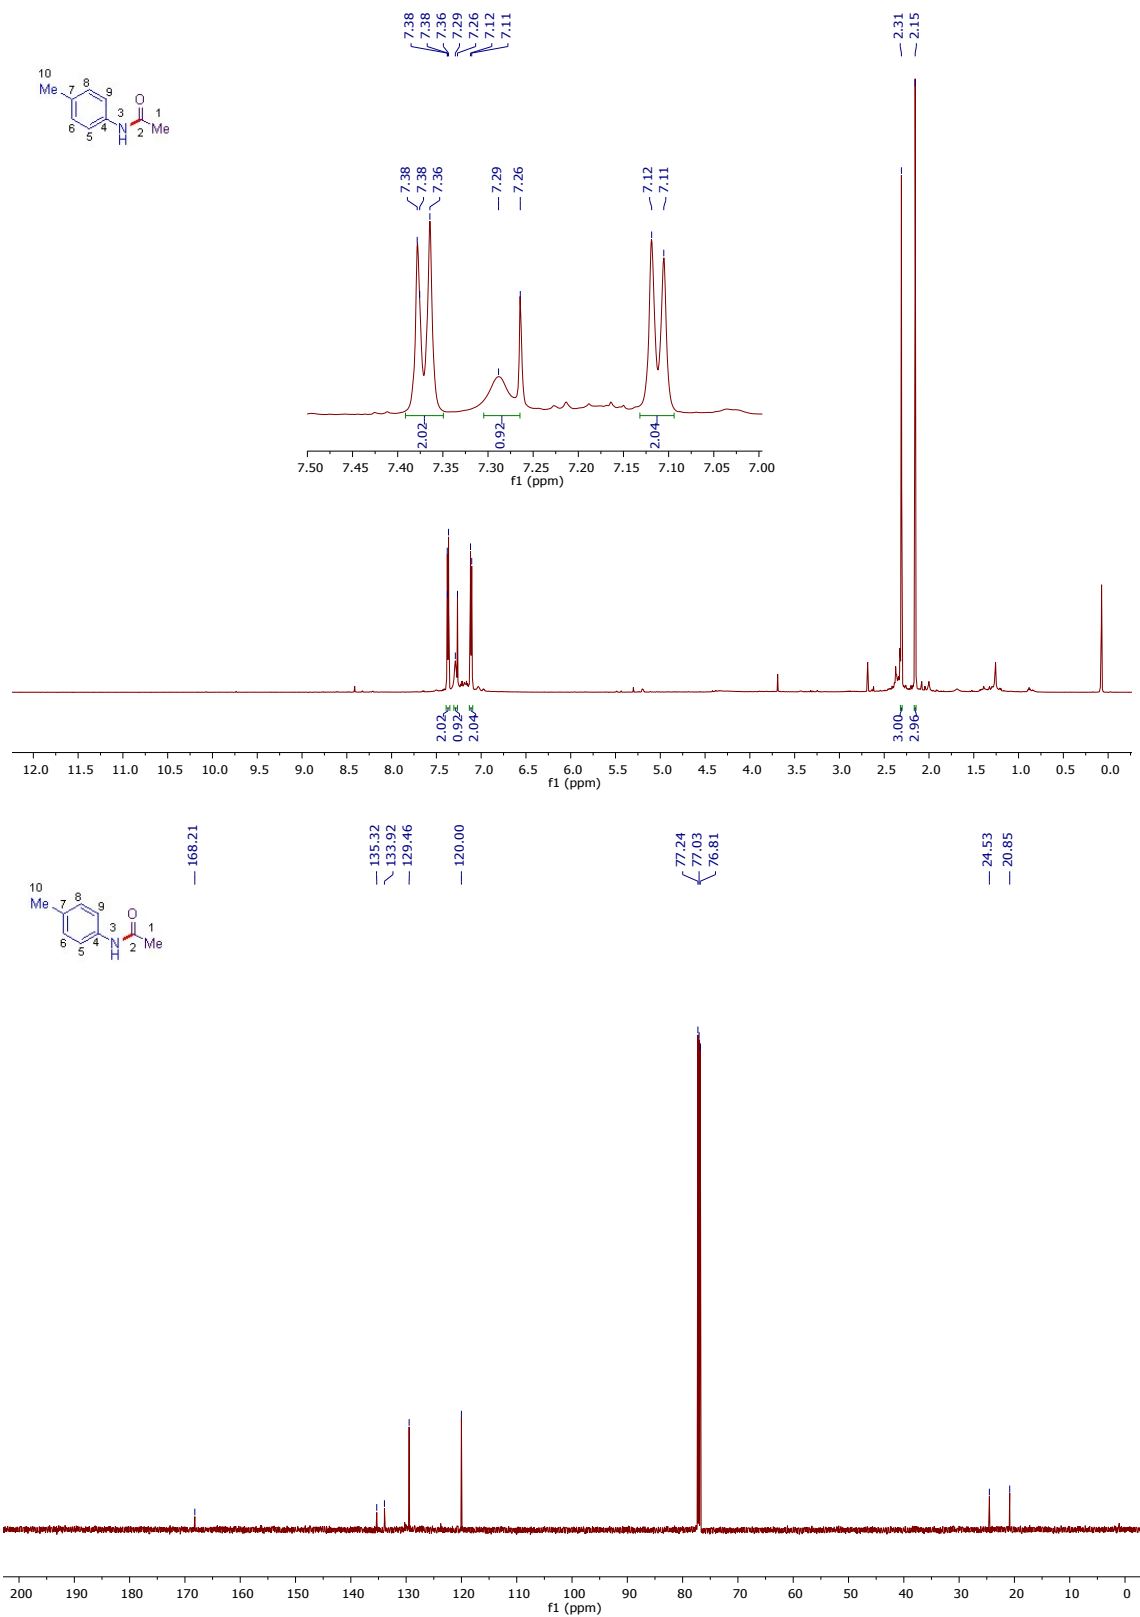

Figure 3. <sup>1</sup>H (600 MHz), <sup>13</sup>C (150 MHz) NMR spectra of **3b** in CDCl<sub>3</sub>.

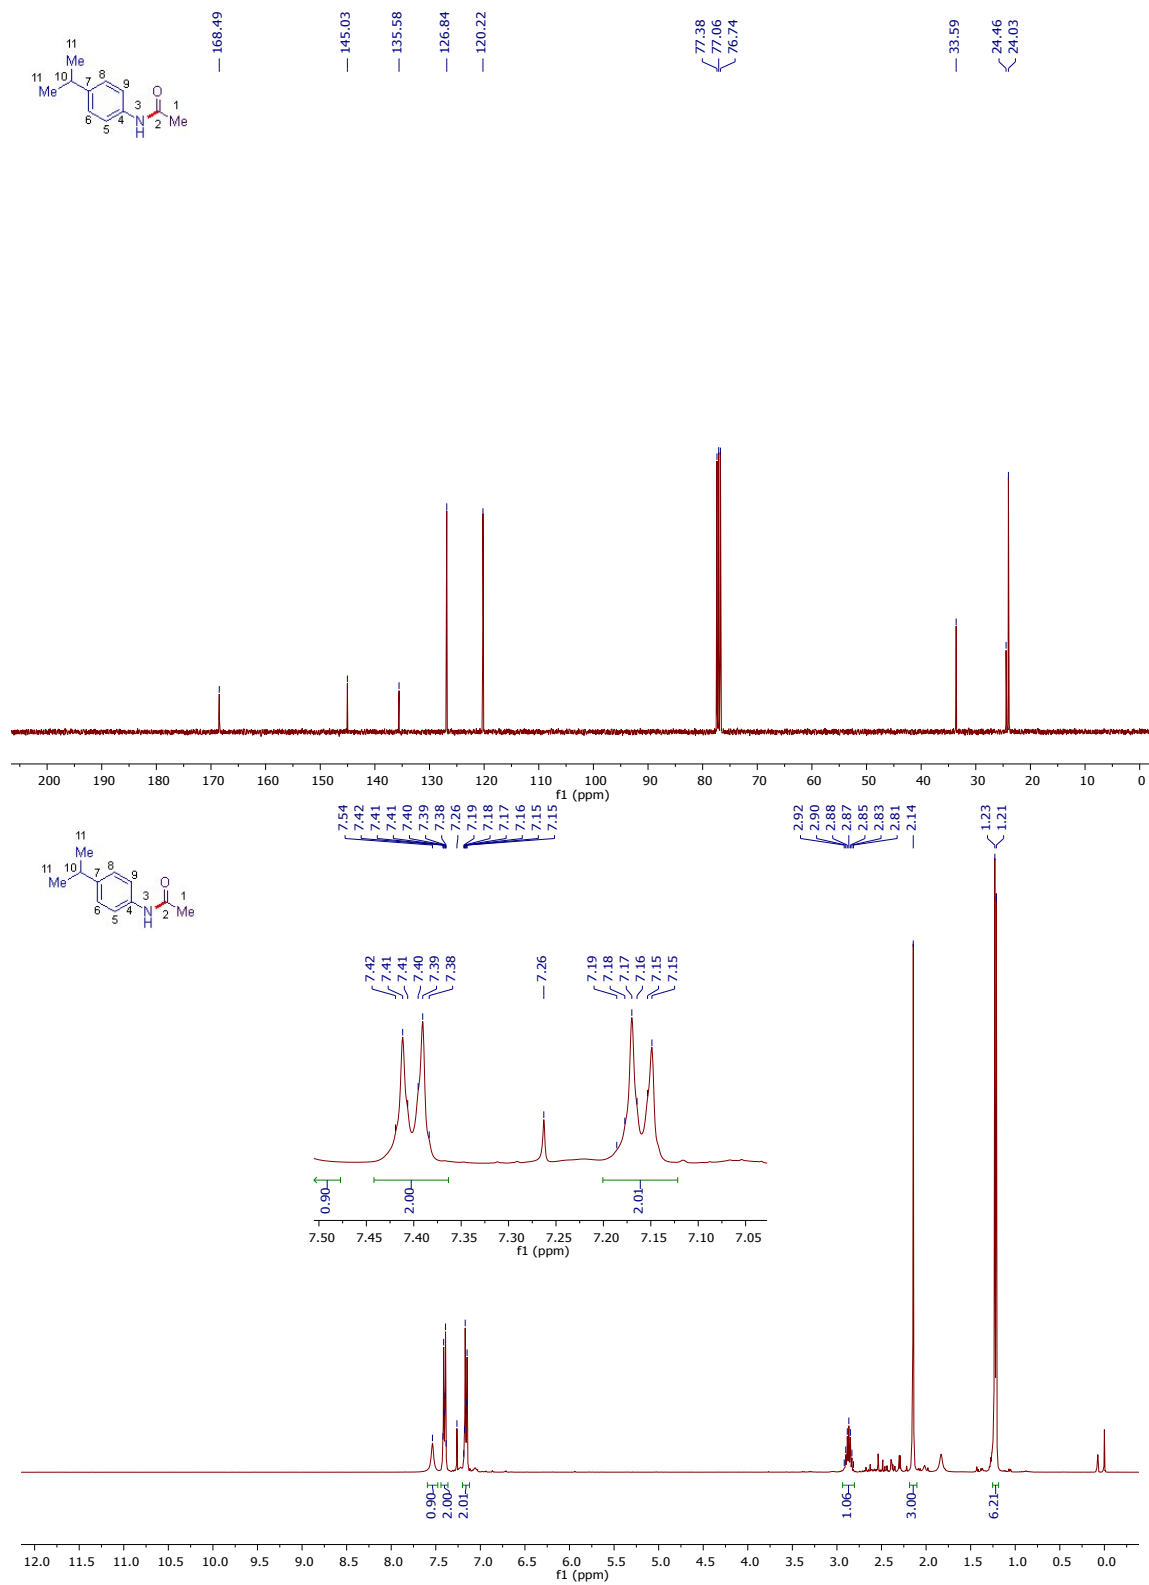

**Figure 4.** <sup>1</sup>H (400 MHz), <sup>13</sup>C (100 MHz) NMR spectra of **3c** in CDCl<sub>3</sub>.

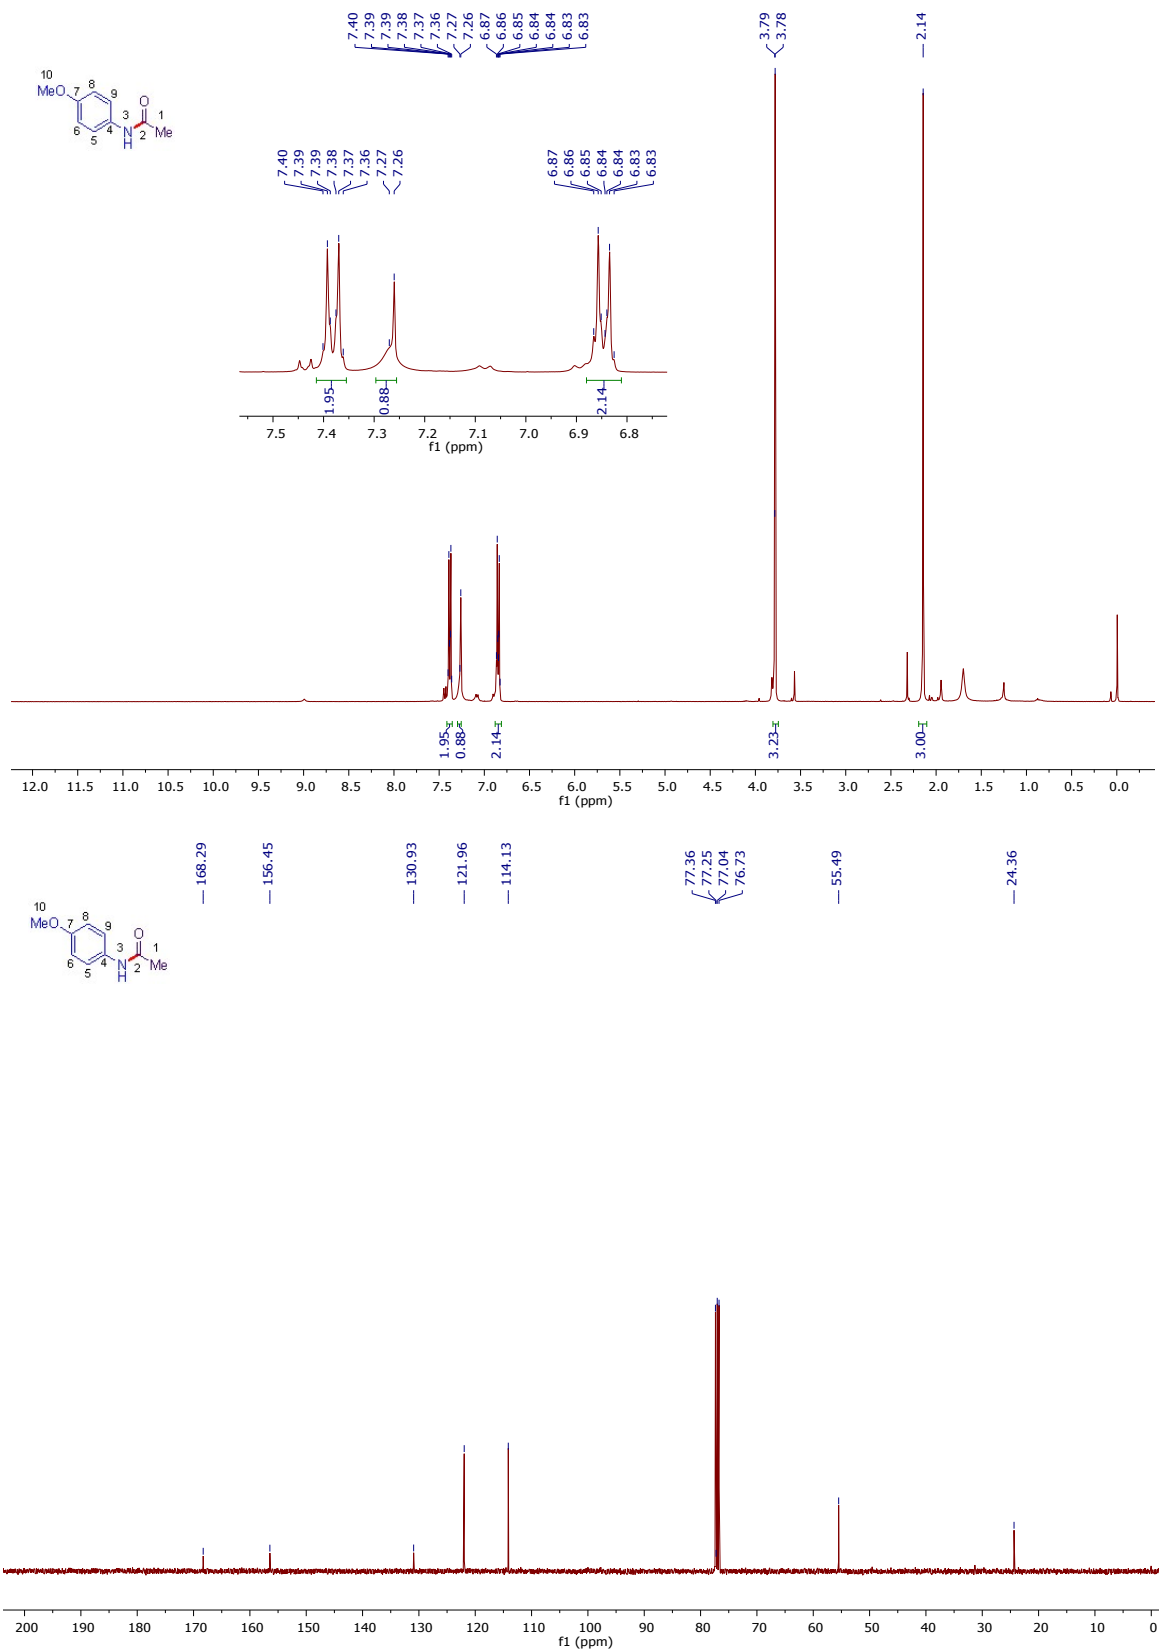

Figure 5.  $^1\text{H}$  (400 MHz),  $^{13}\text{C}$  (100 MHz) NMR spectra of **3d** in  $\text{CDCl}_3$ .



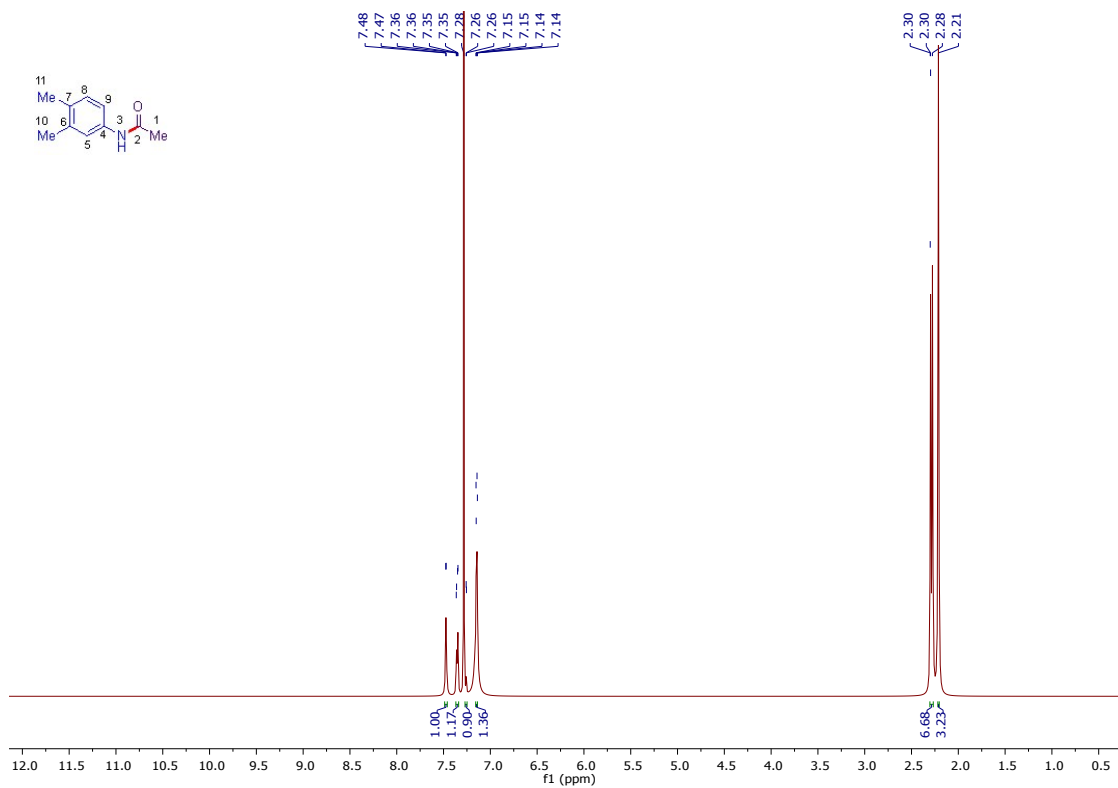

Figure 6. <sup>1</sup>H (600 MHz) NMR spectra of 3e in CDCl<sub>3</sub>.

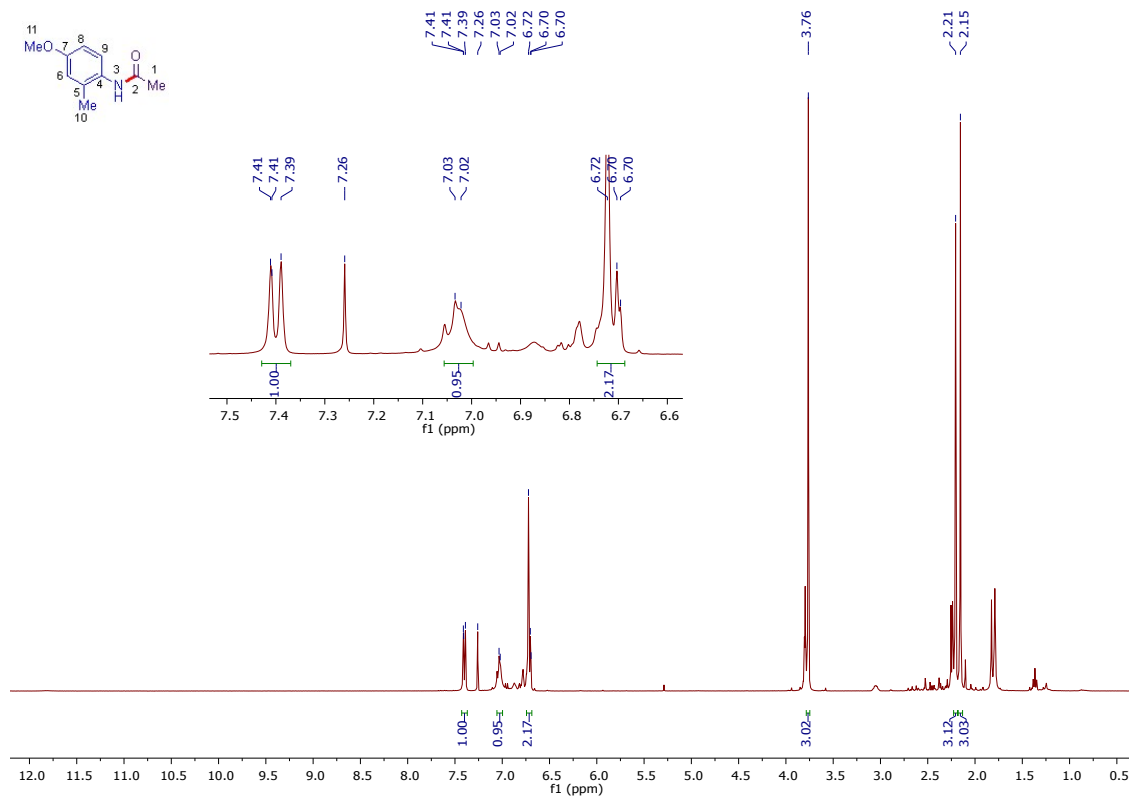

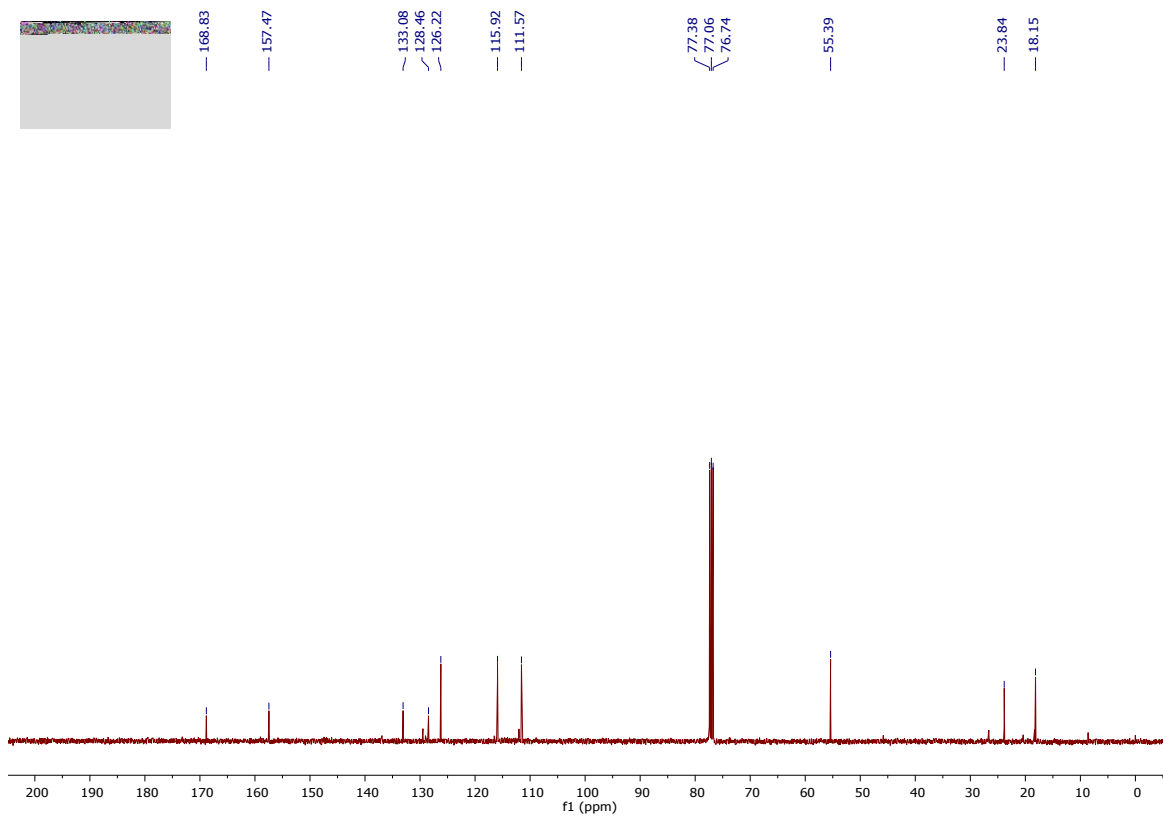

Figure 7. <sup>1</sup>H (400 MHz) and <sup>13</sup>C (100 MHz) NMR spectra of 3f in CDCl<sub>3</sub>.

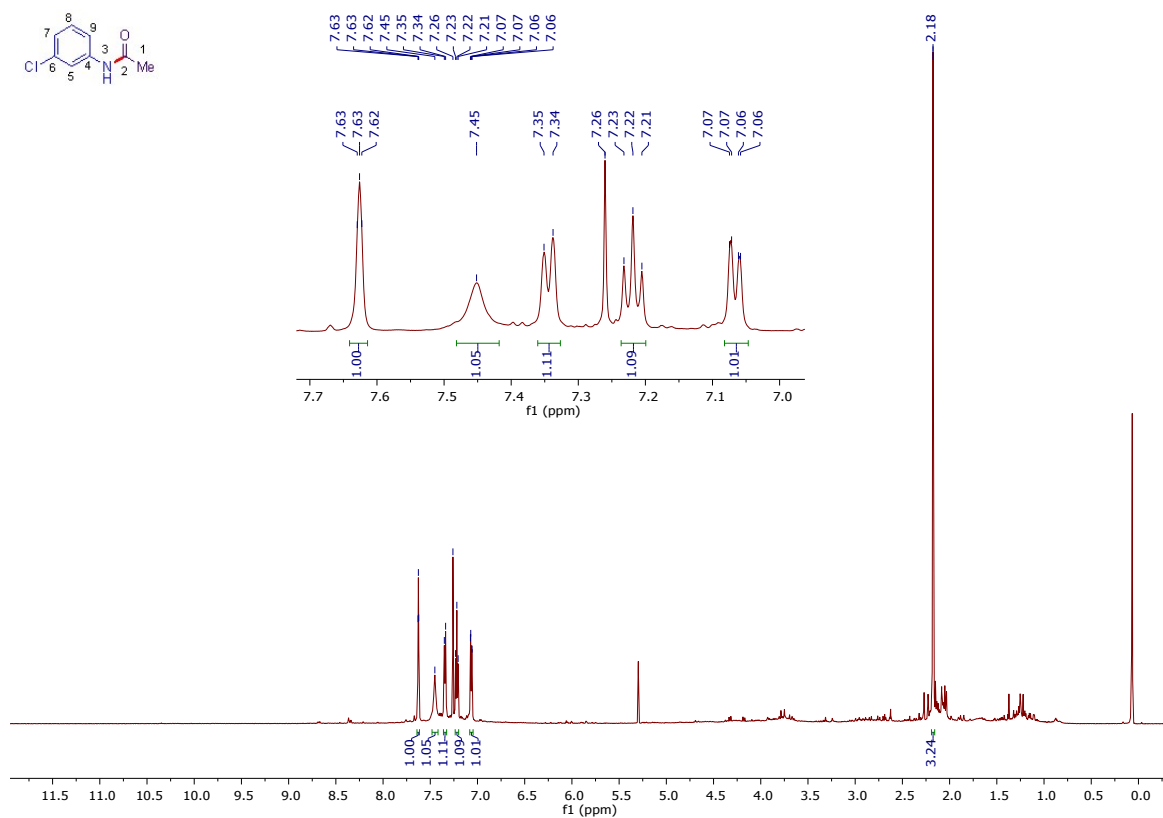

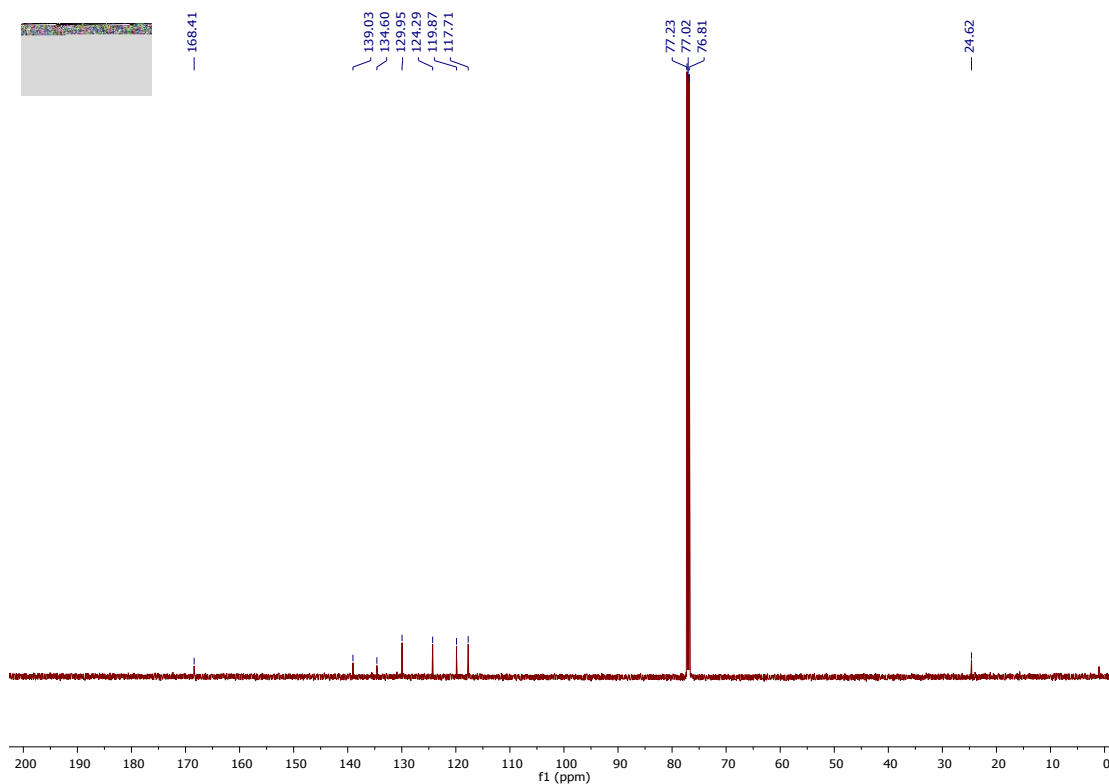

Figure 8.  $^1\text{H}$  (600 MHz) and  $^{13}\text{C}$  (150 MHz) NMR spectra of **3g** in  $\text{CDCl}_3$ .

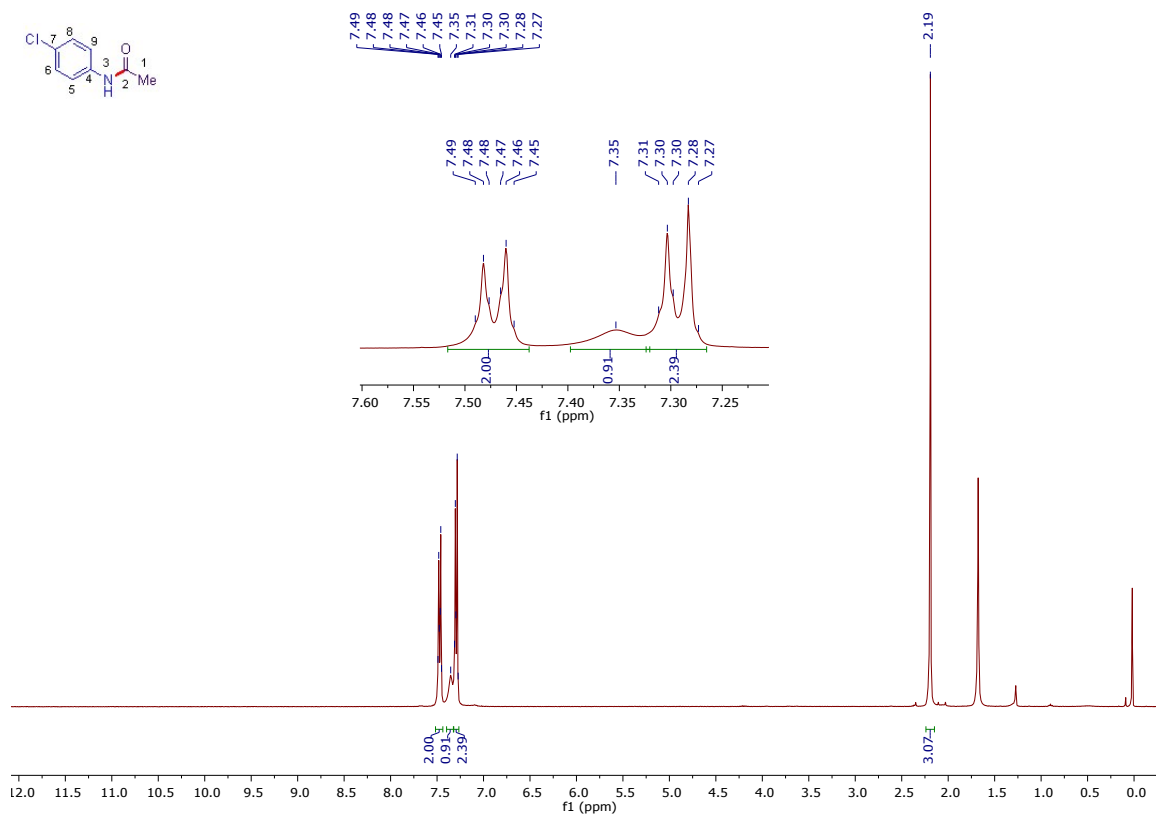

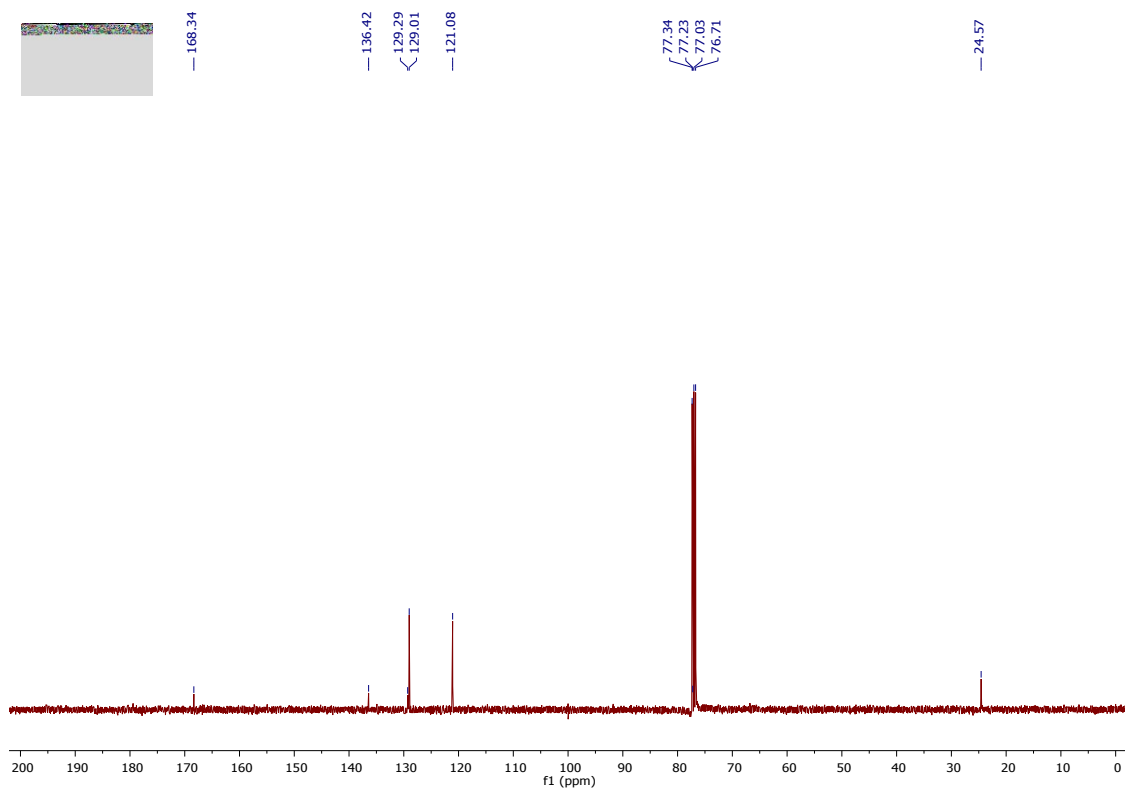

**Figure 9.**  $^1\text{H}$  (400 MHz) and  $^{13}\text{C}$  (100 MHz) NMR spectra of **3h** in  $\text{CDCl}_3$ .

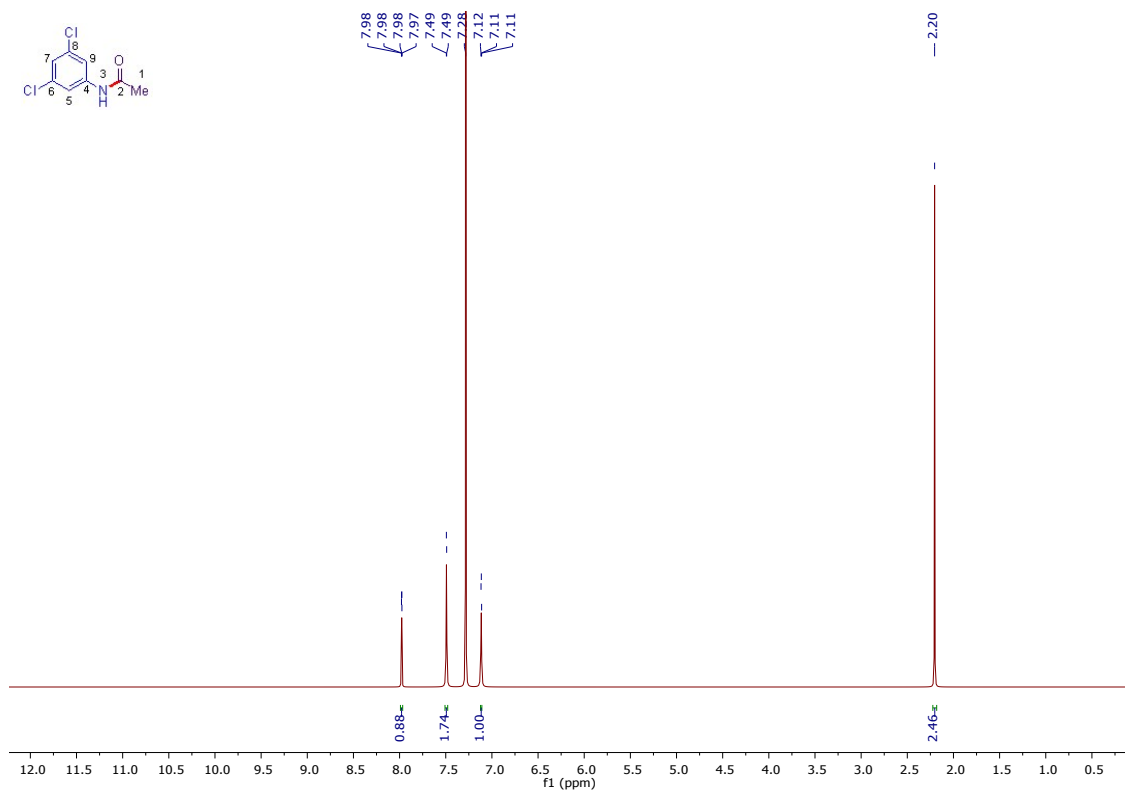

**Figure 10.**  $^1\text{H}$  (400 MHz) NMR spectra of **3i** in  $\text{CDCl}_3$ .

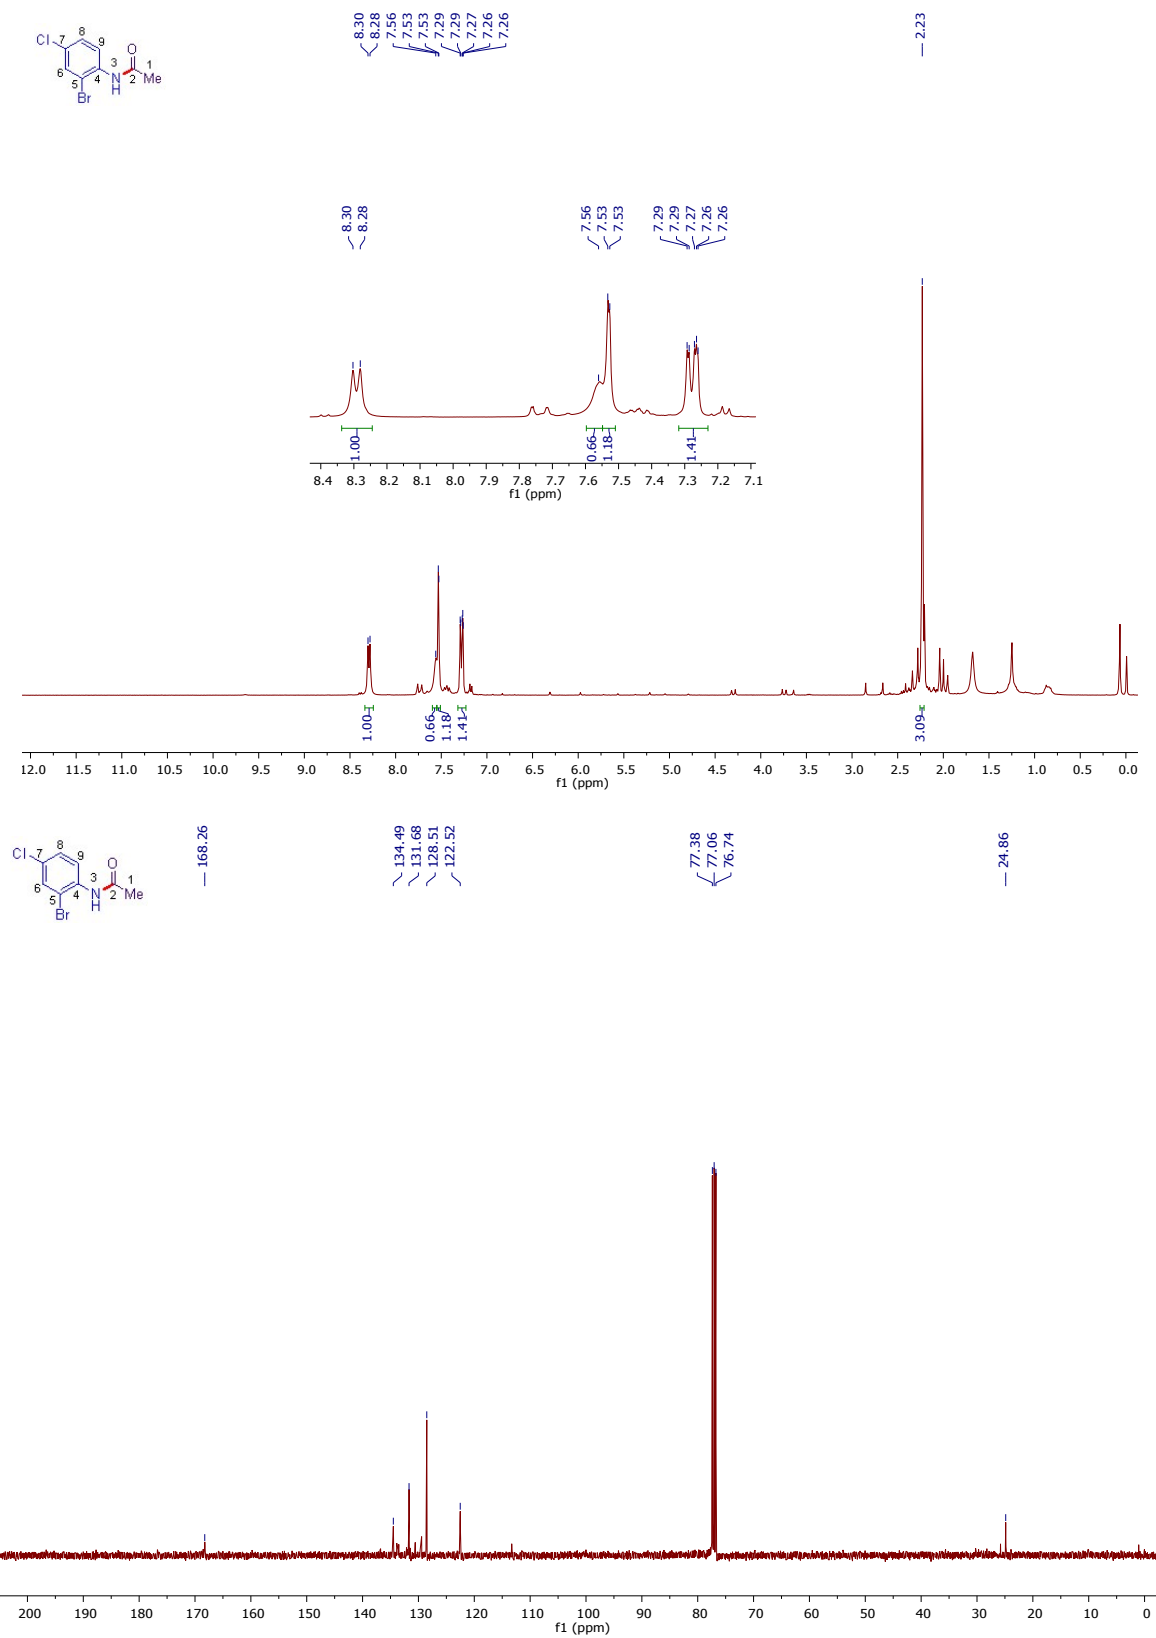

Figure 11. <sup>1</sup>H (400 MHz) and <sup>13</sup>C (100 MHz) NMR spectra of **3j** in CDCl<sub>3</sub>.

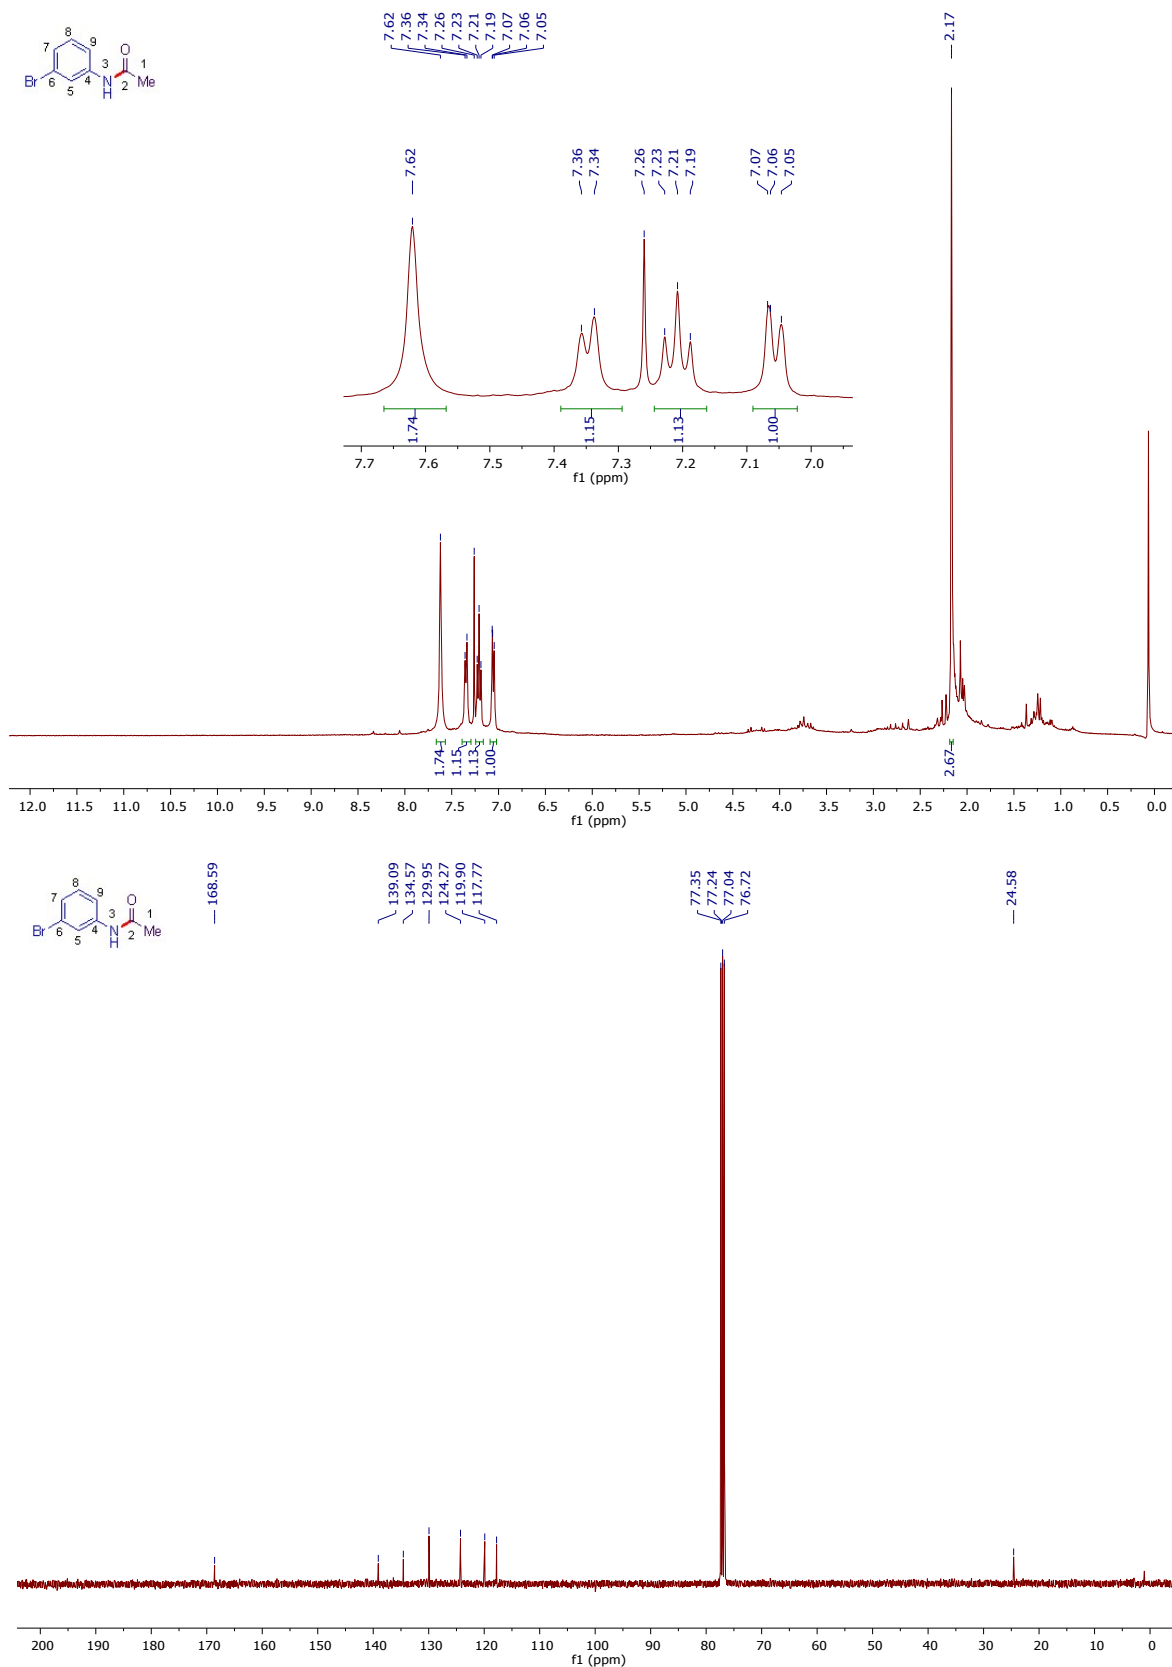

Figure 12. <sup>1</sup>H (400 MHz) and <sup>13</sup>C (100 MHz) NMR spectra of **3k** in CDCl<sub>3</sub>.

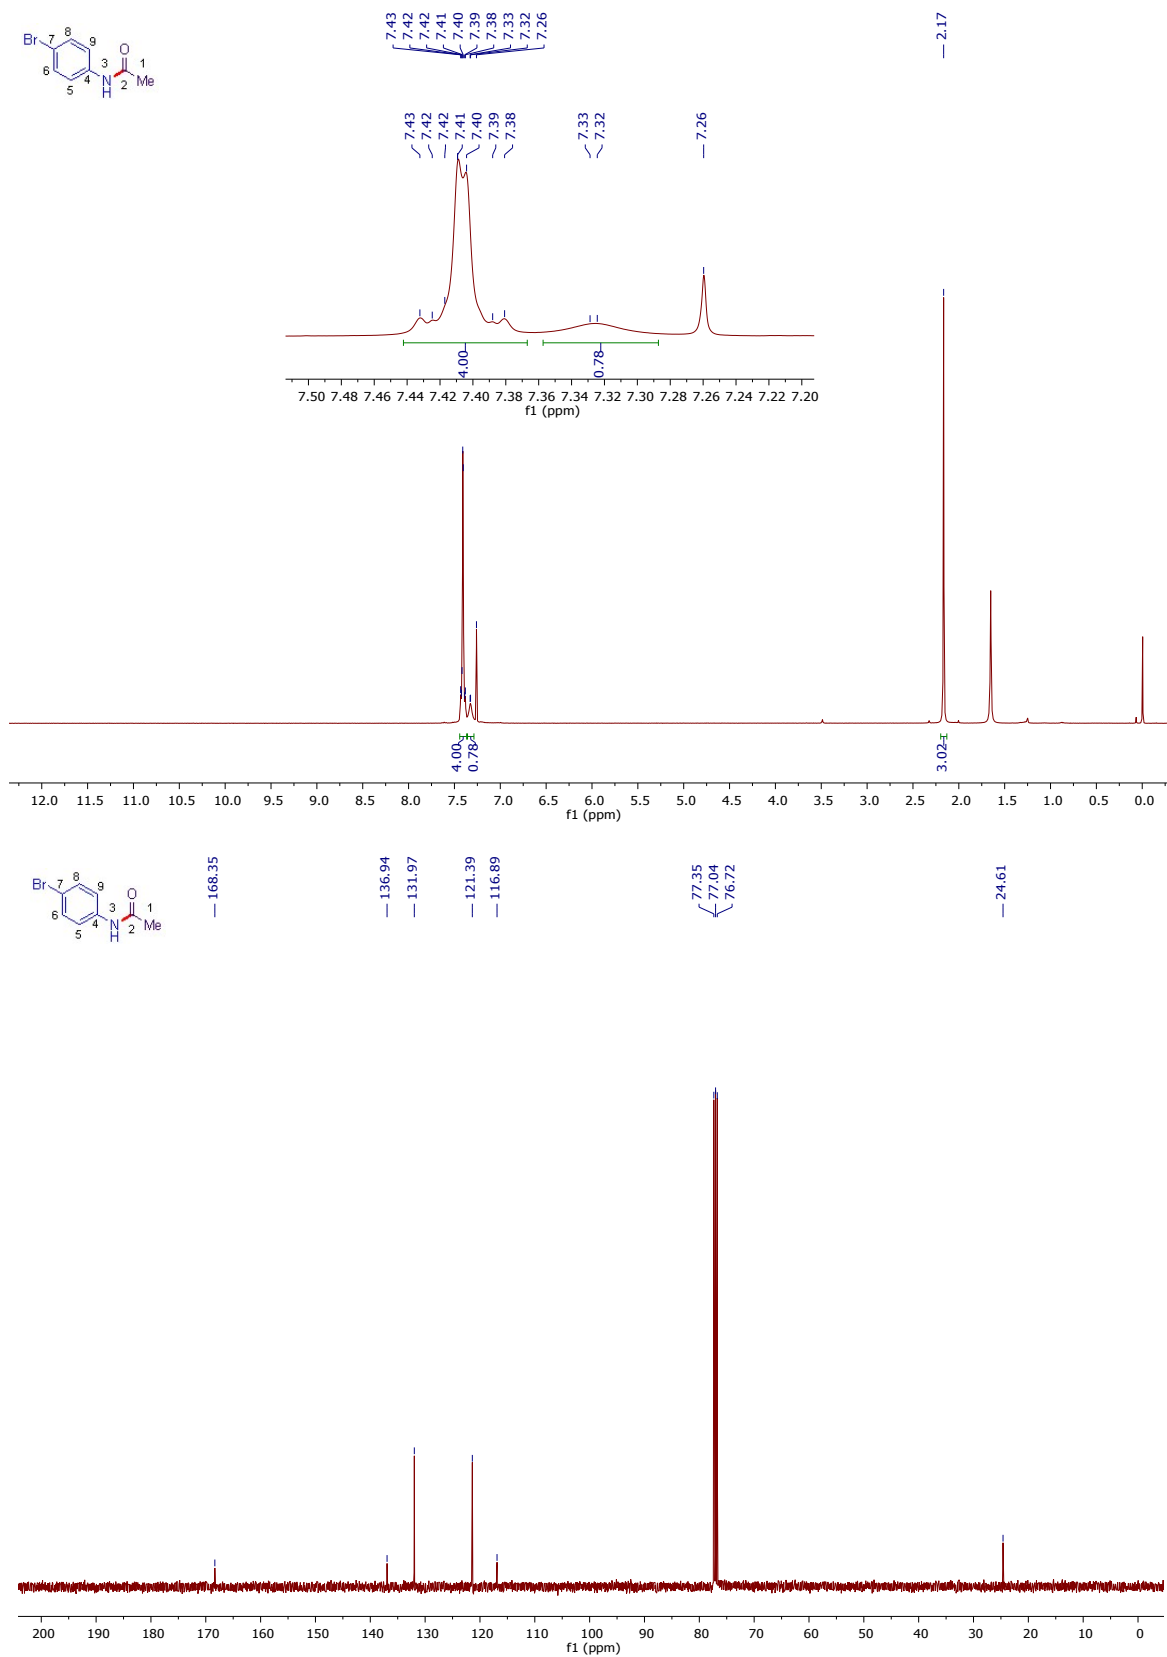

**Figure 13.** <sup>1</sup>H (400 MHz) and <sup>13</sup>C (100 MHz) NMR spectra of **31** in CDCl<sub>3</sub>.

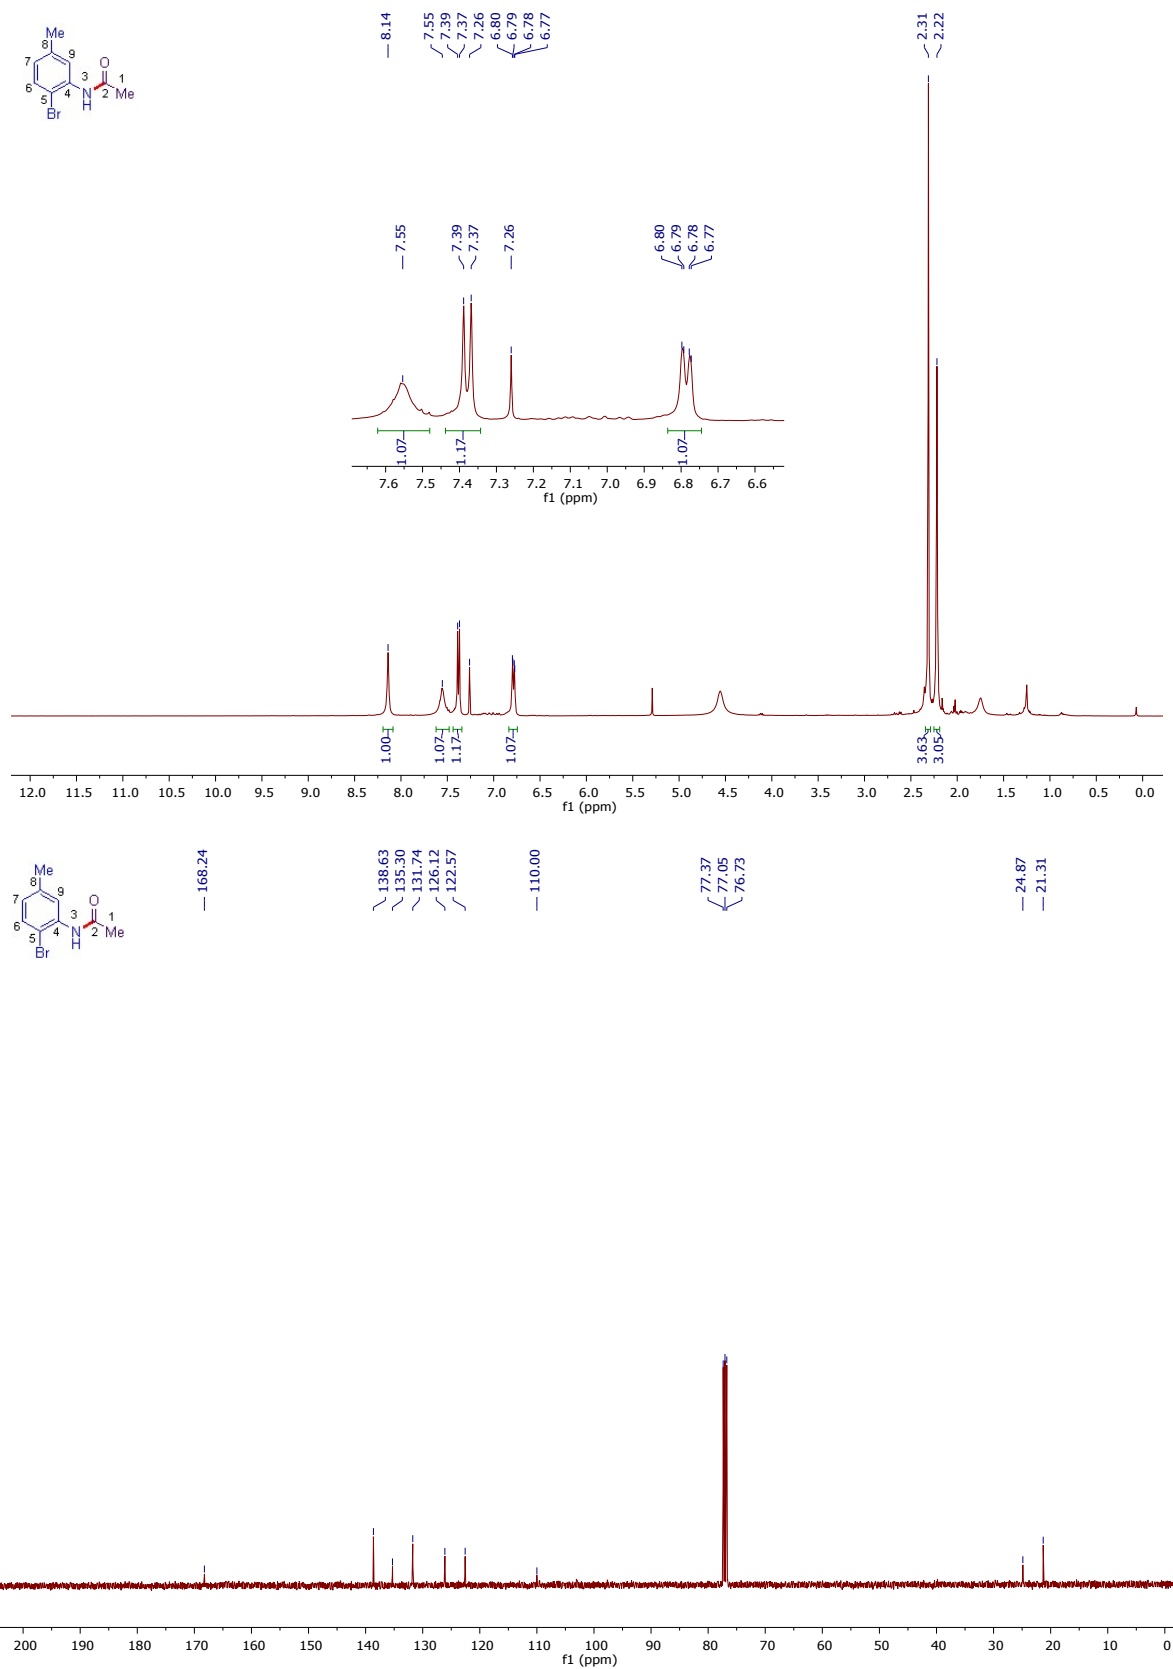

Figure 14. <sup>1</sup>H (400 MHz) and <sup>13</sup>C (100 MHz) NMR spectra of **3m** in CDCl<sub>3</sub>



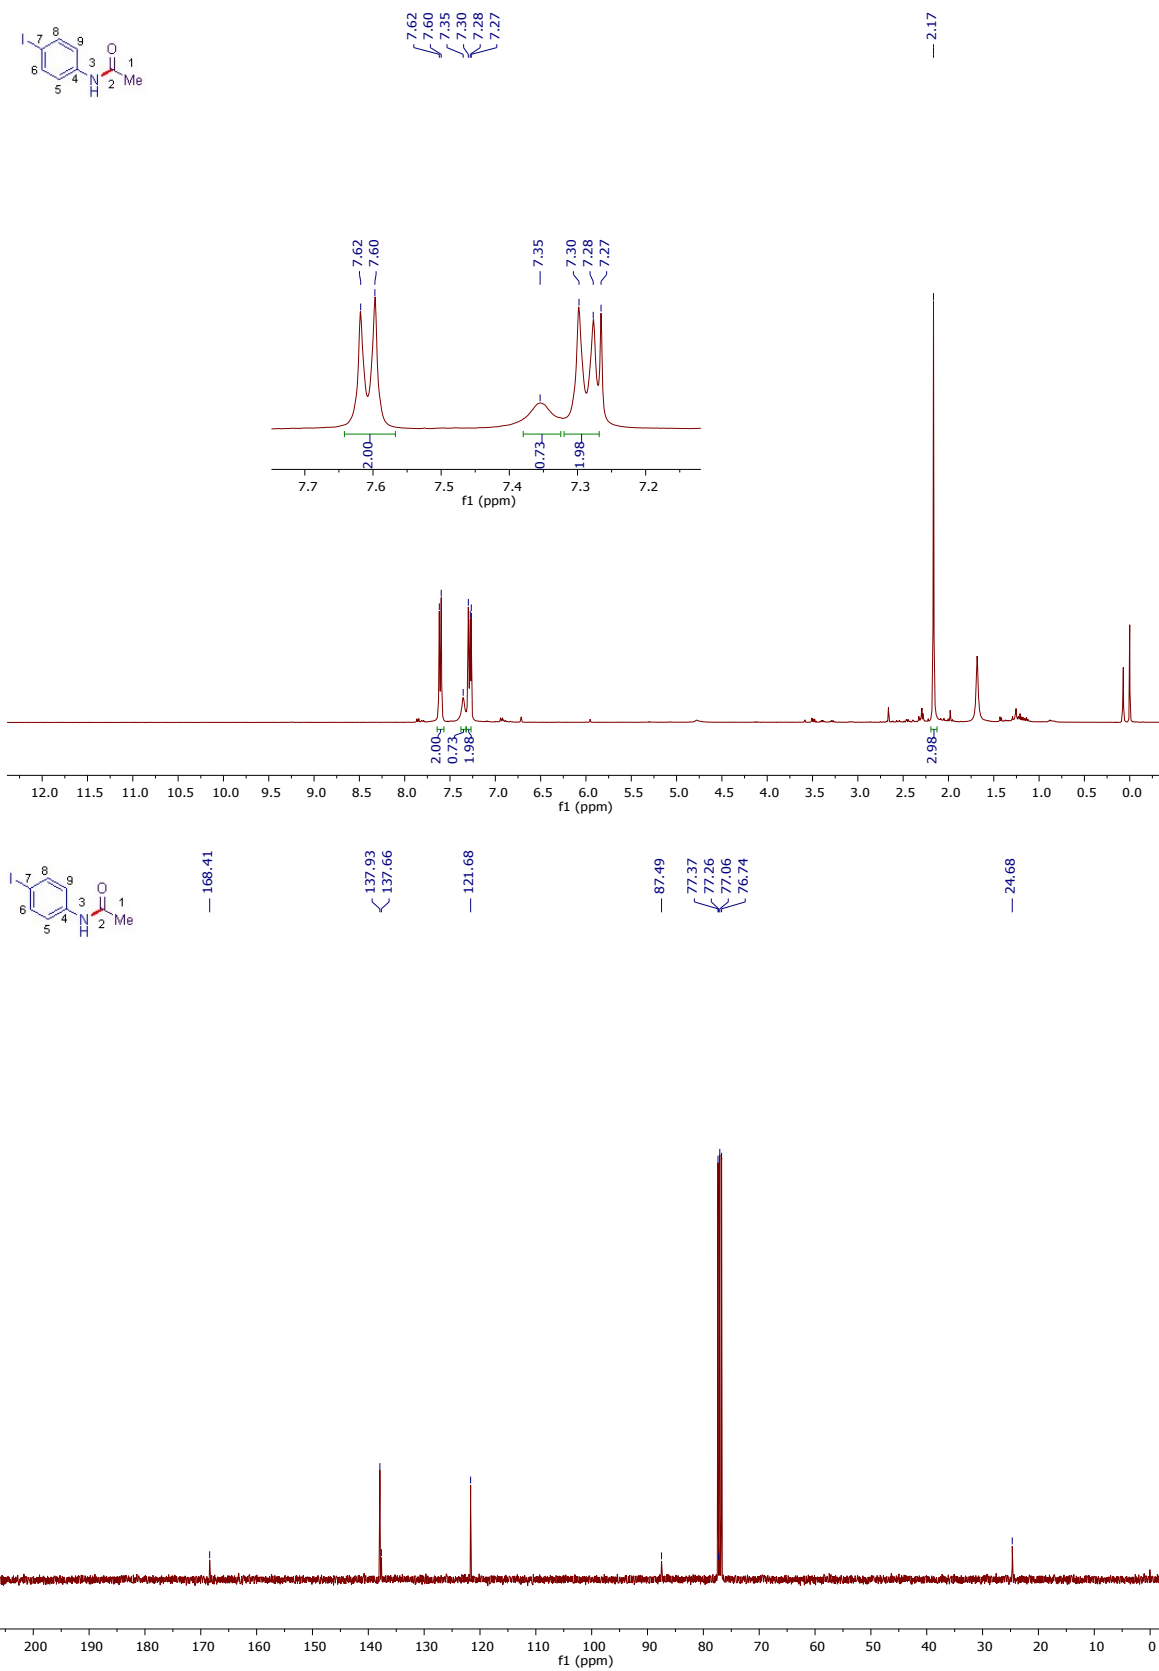

Figure 15. <sup>1</sup>H (400 MHz) and <sup>13</sup>C (100 MHz) NMR spectra of **3n** in CDCl<sub>3</sub>.

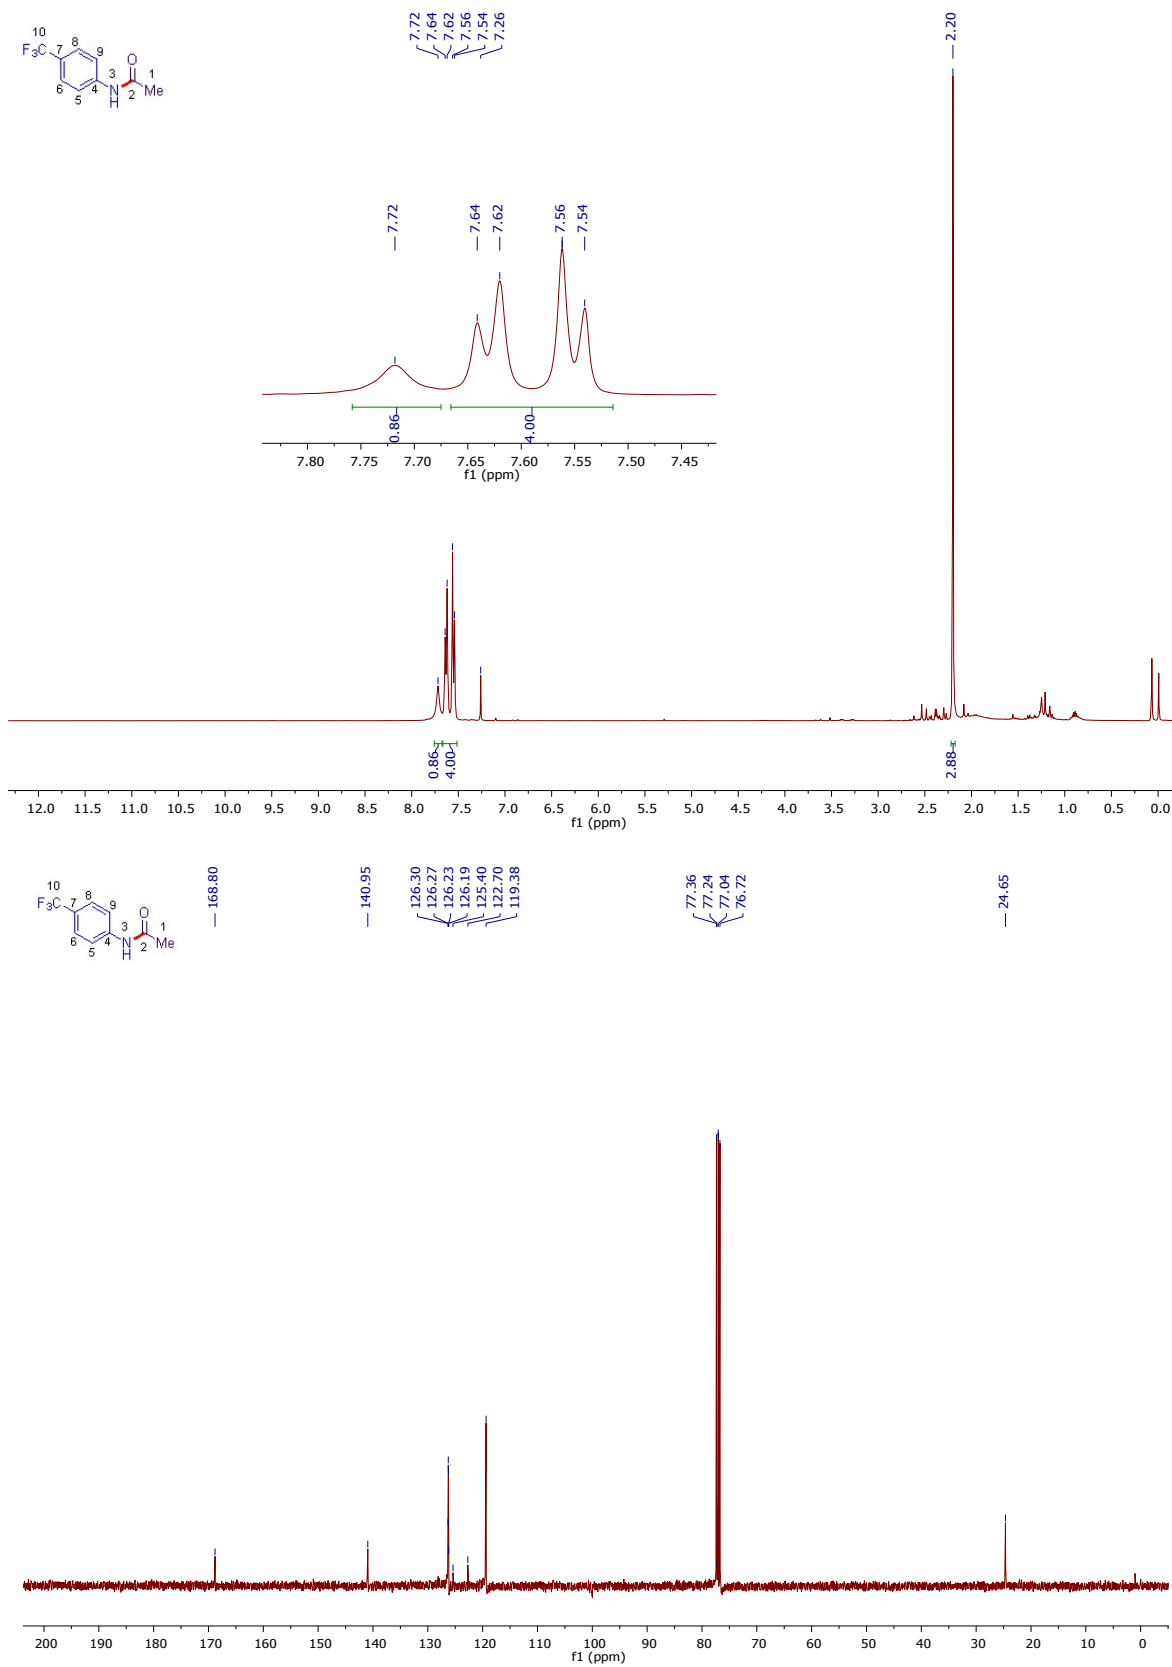

Figure 16. <sup>1</sup>H (400 MHz) and <sup>13</sup>C (100 MHz) NMR spectra of **3o** in CDCl<sub>3</sub>.

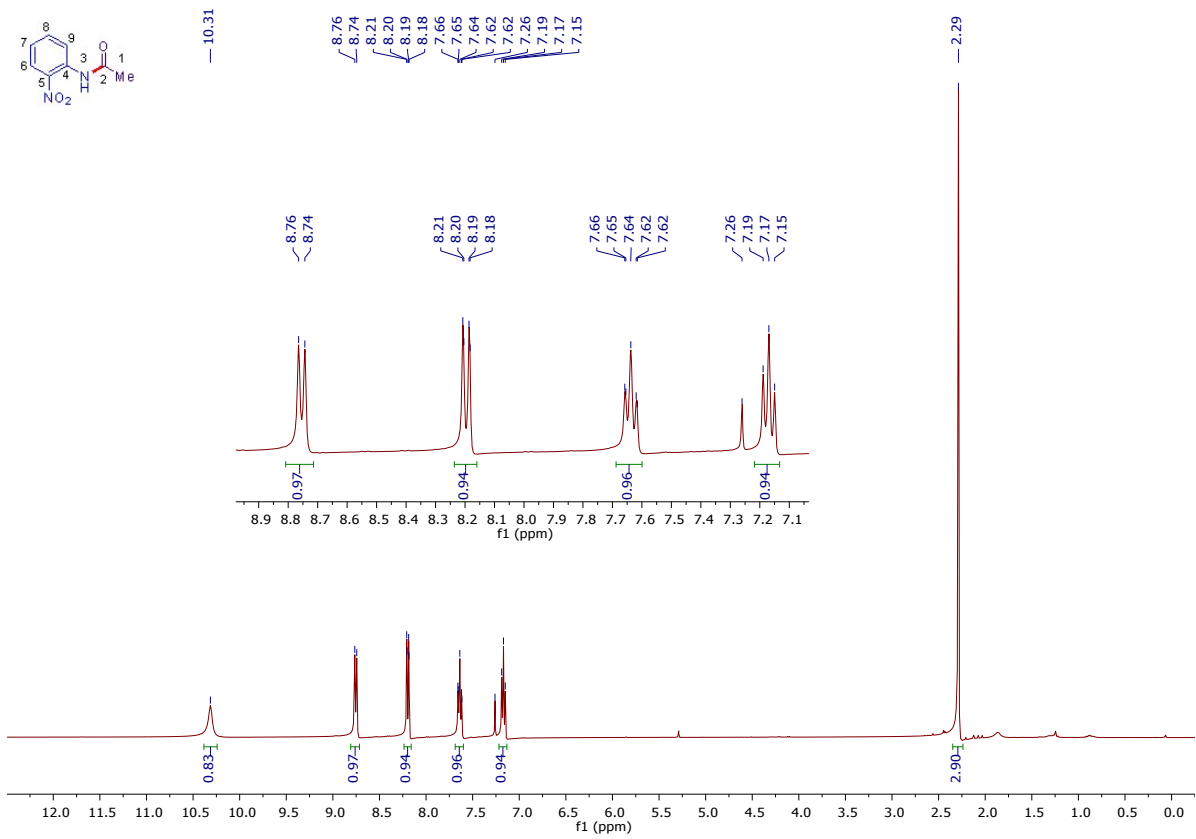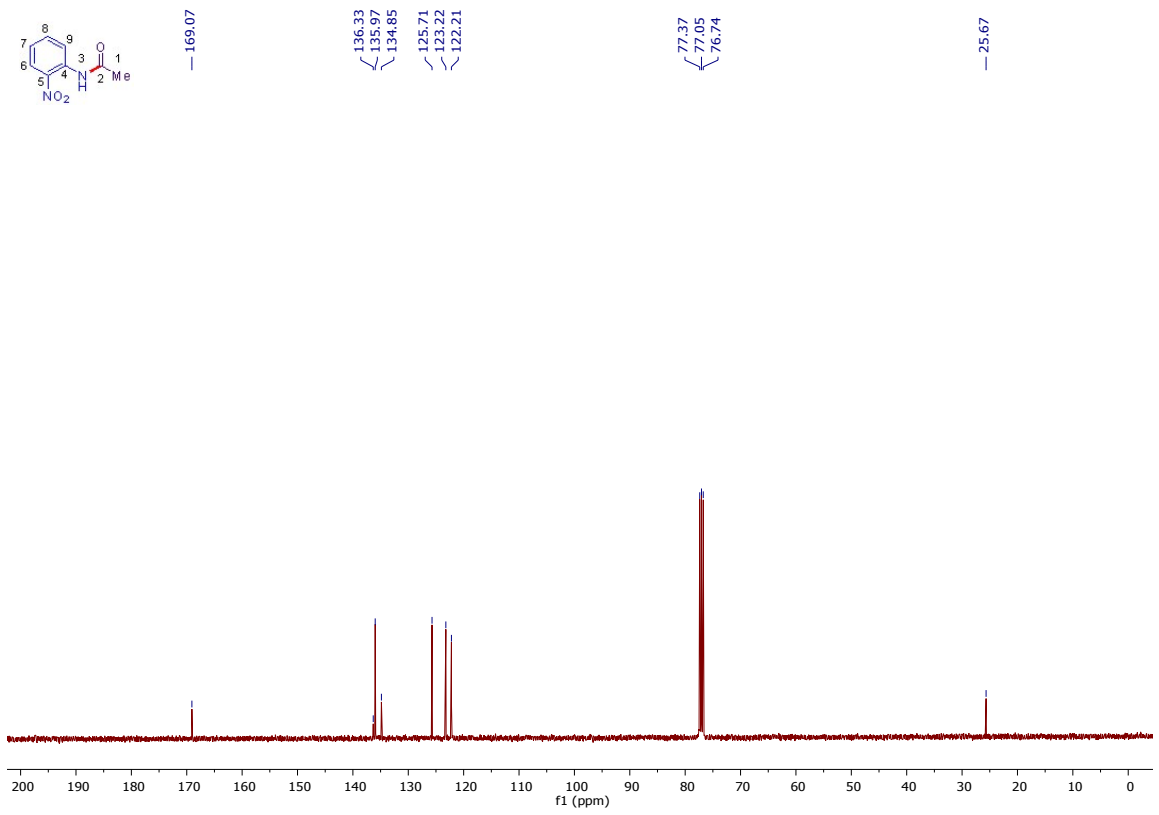

**Figure 17.**  $^1\text{H}$  (400 MHz) and  $^{13}\text{C}$  (100 MHz) NMR spectra of **3p** in  $\text{CDCl}_3$ .

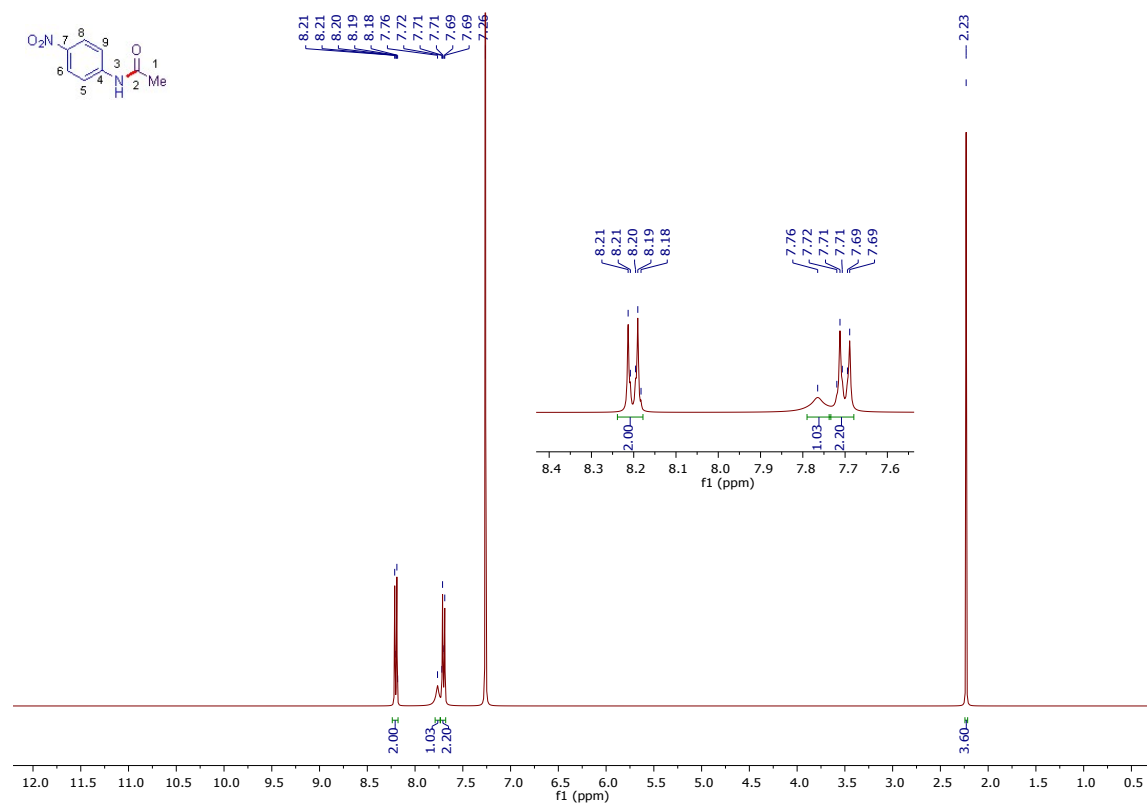

**Figure 18.**  $^1\text{H}$  (400 MHz) NMR spectra of **3q** in  $\text{CDCl}_3$ .

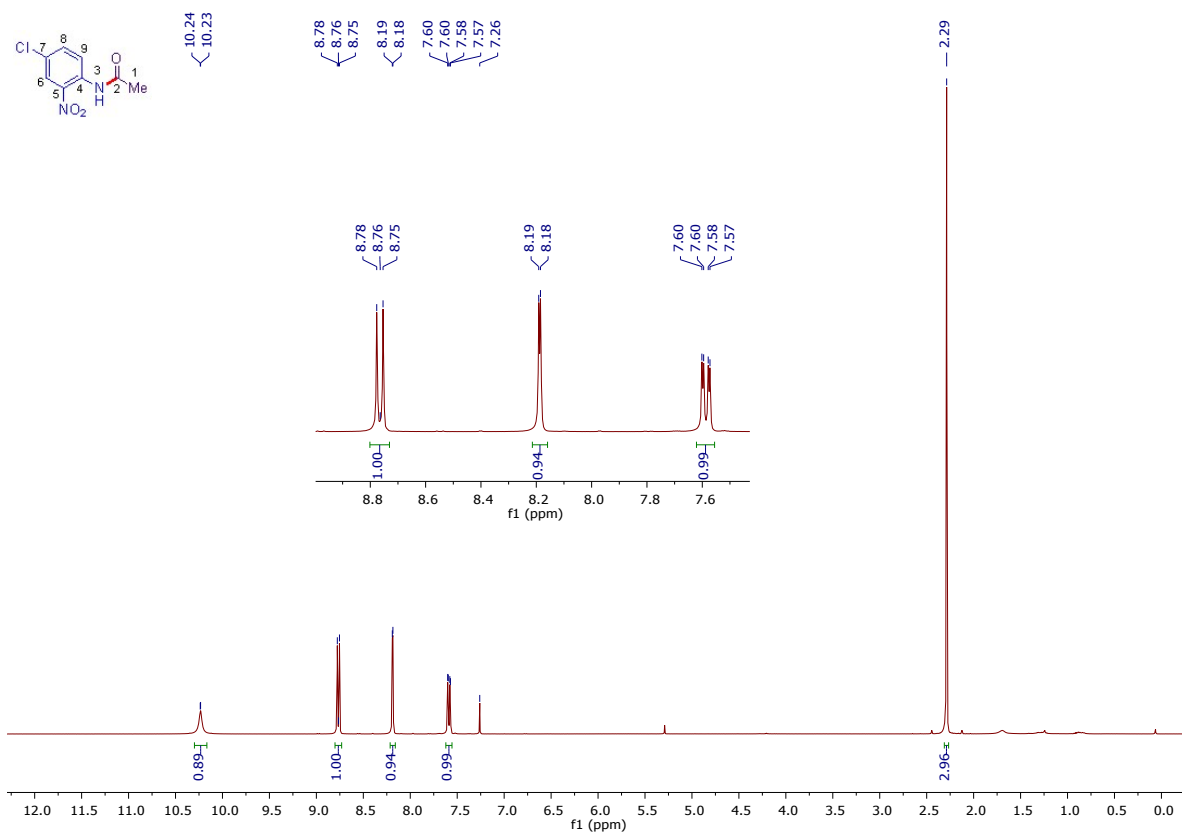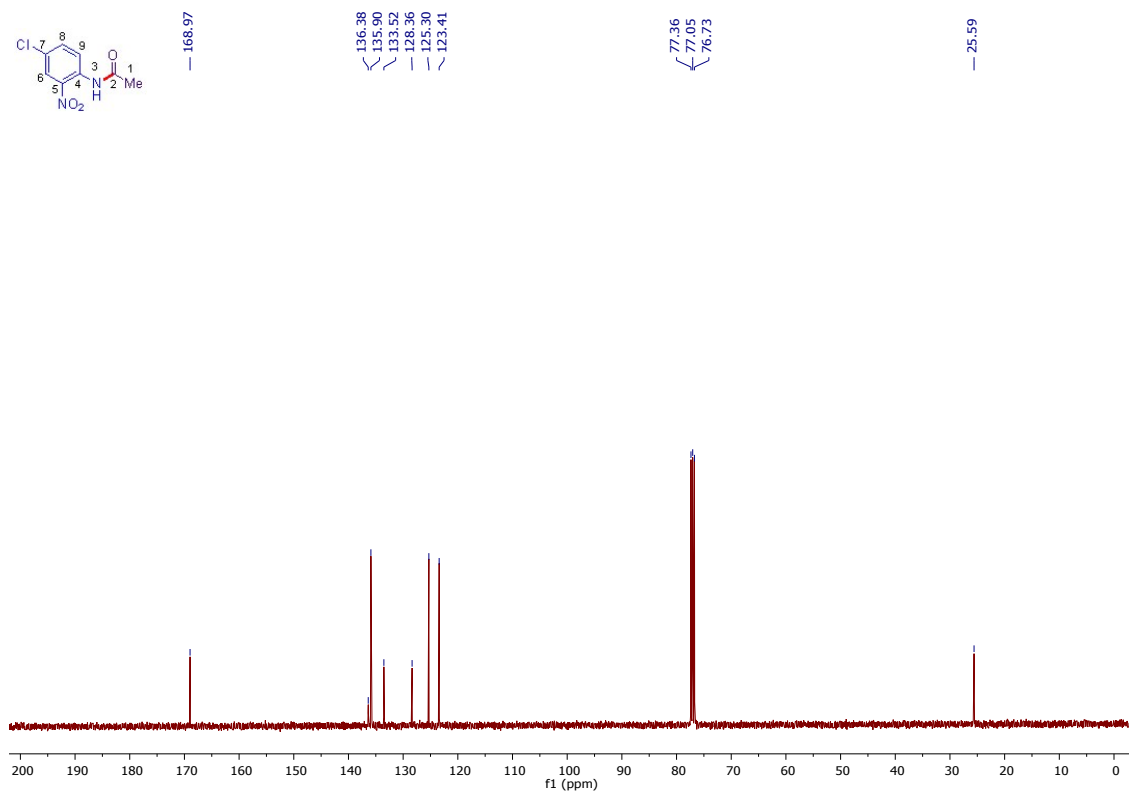

**Figure 19.** <sup>1</sup>H (400 MHz) and <sup>13</sup>C (100 MHz) NMR spectra of **3r** in CDCl<sub>3</sub>.

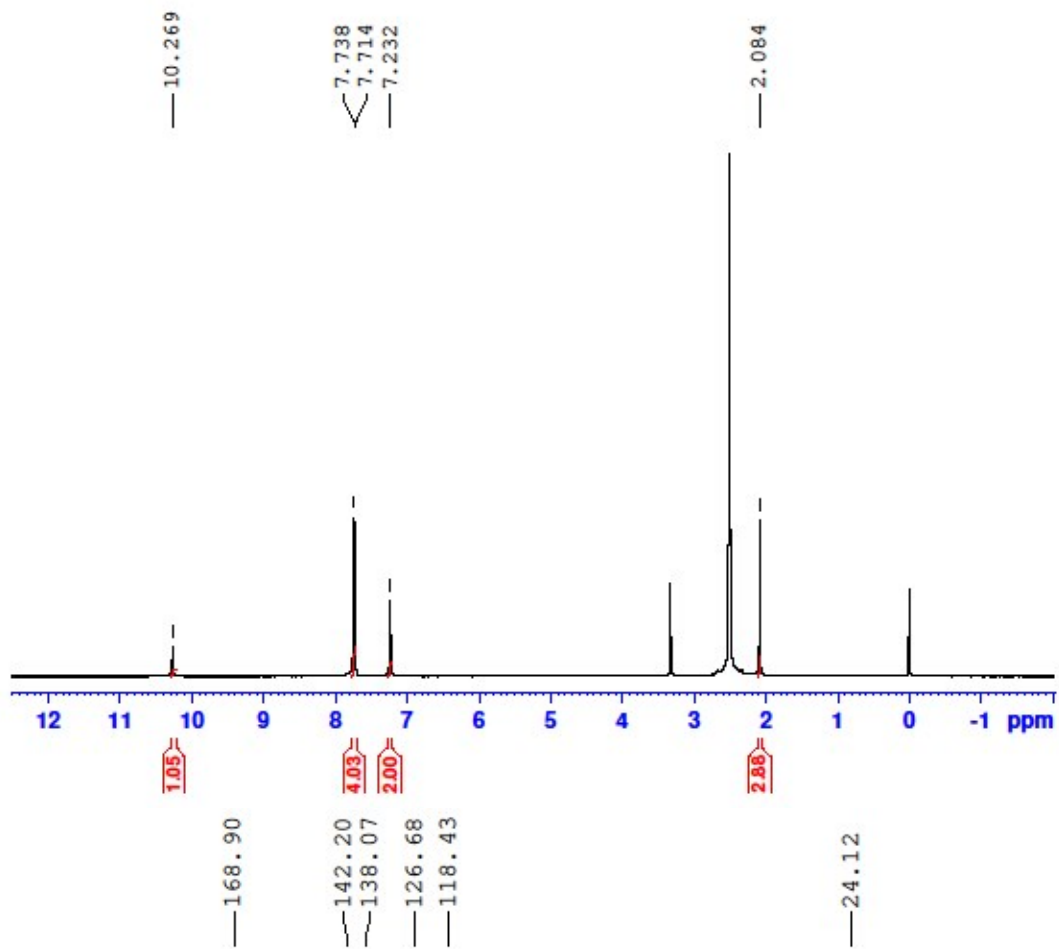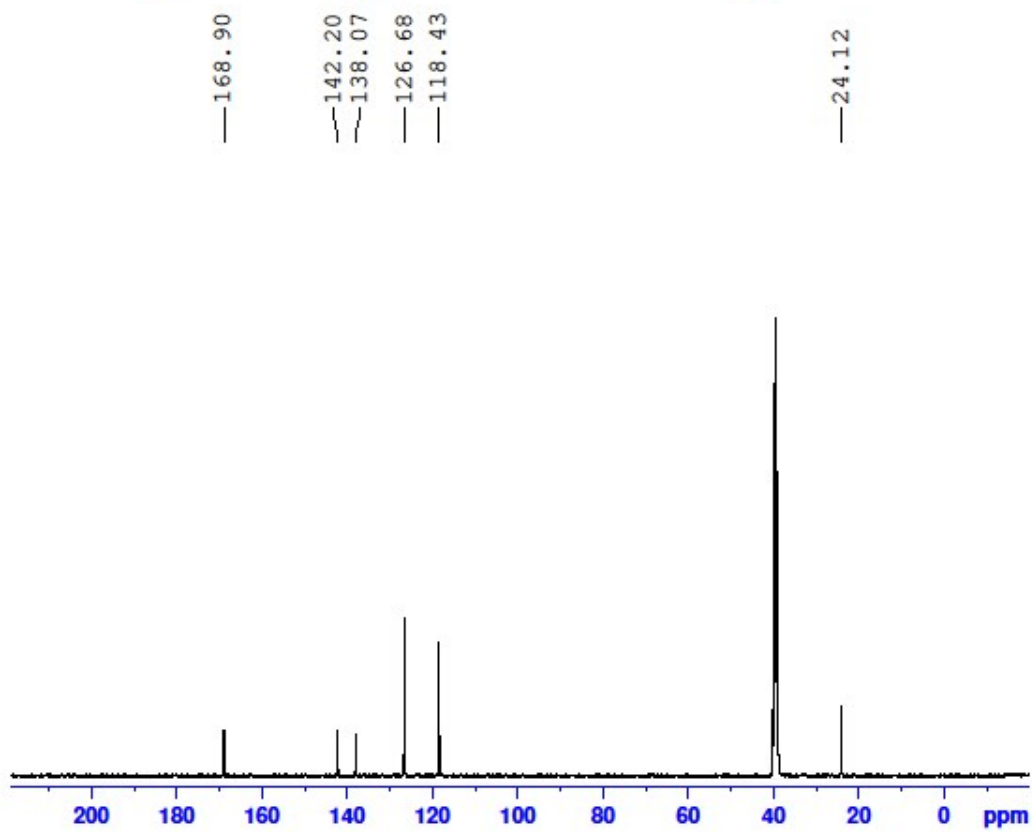

**Figure 20.**  $^1\text{H}$  (400 MHz) and  $^{13}\text{C}$  (100 MHz) NMR spectra of **3s** in  $\text{DMSO-d}_6$ .

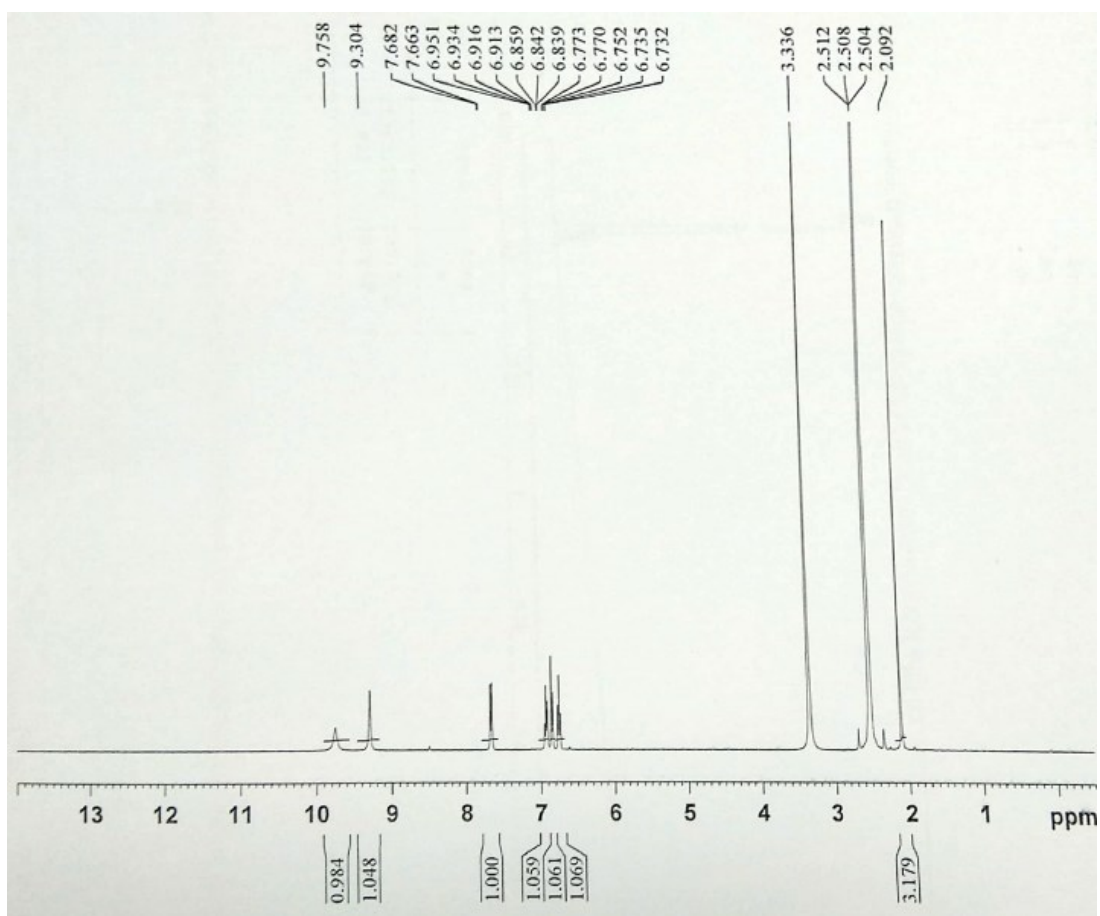

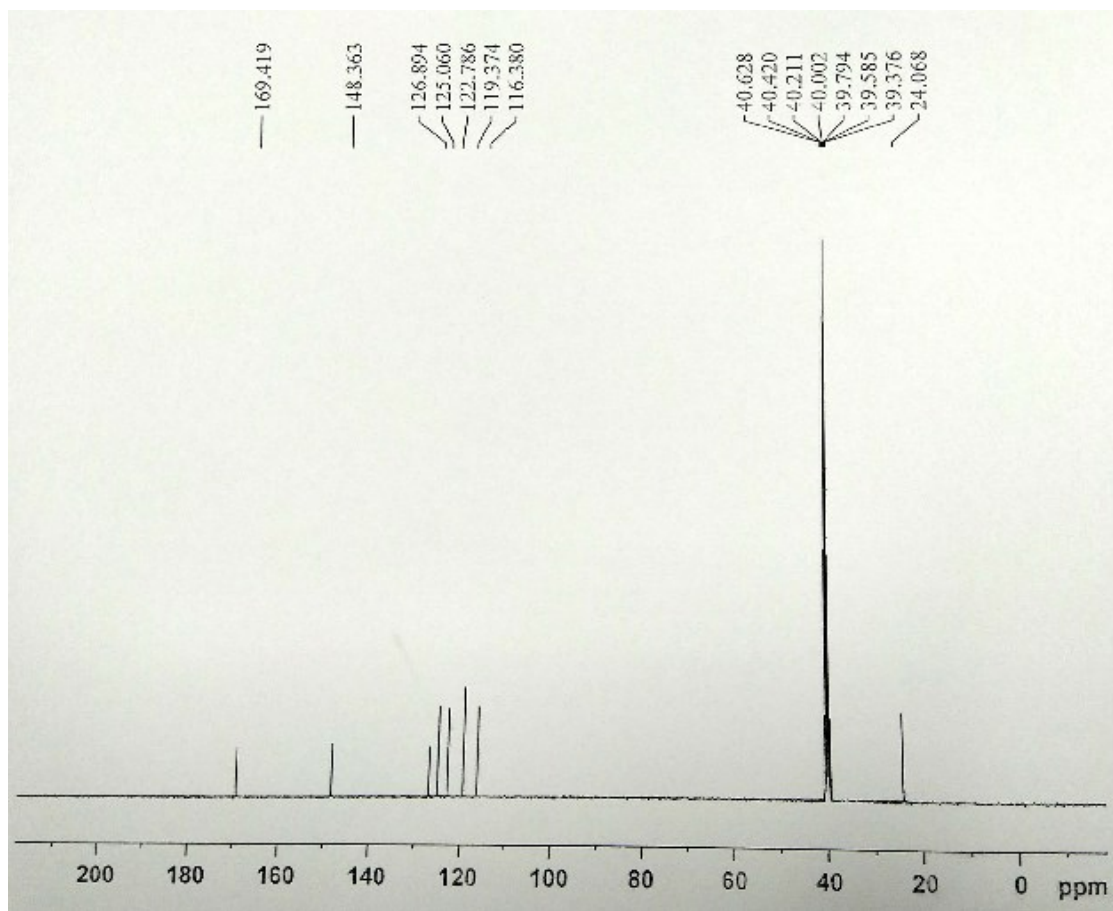

**Figure 21.**  $^1\text{H}$  (400 MHz) and  $^{13}\text{C}$  (100 MHz) NMR spectra of **3t** in  $\text{DMSO-d}_6$ .



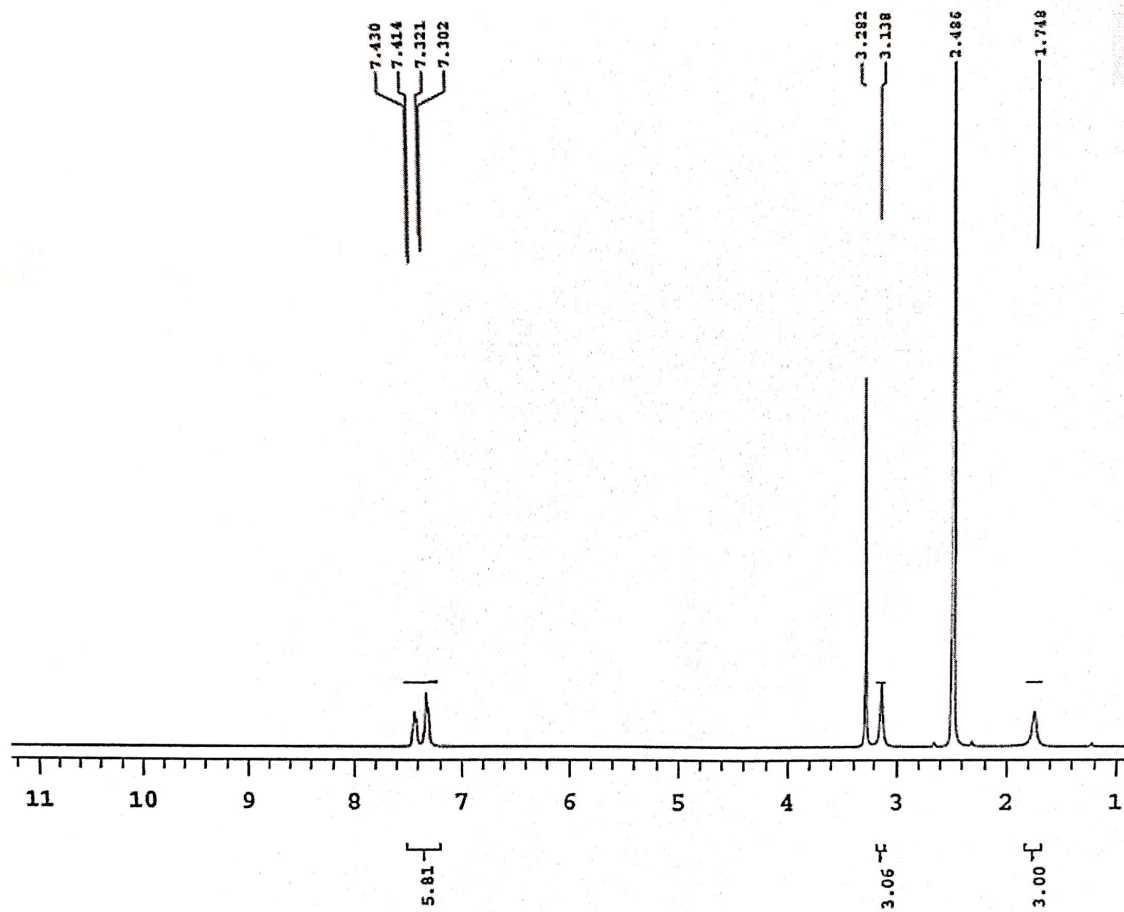

**Figure 22.**  $^1\text{H}$  (400 MHz) NMR spectra of **3u** in  $\text{DMSO-d}_6$ .

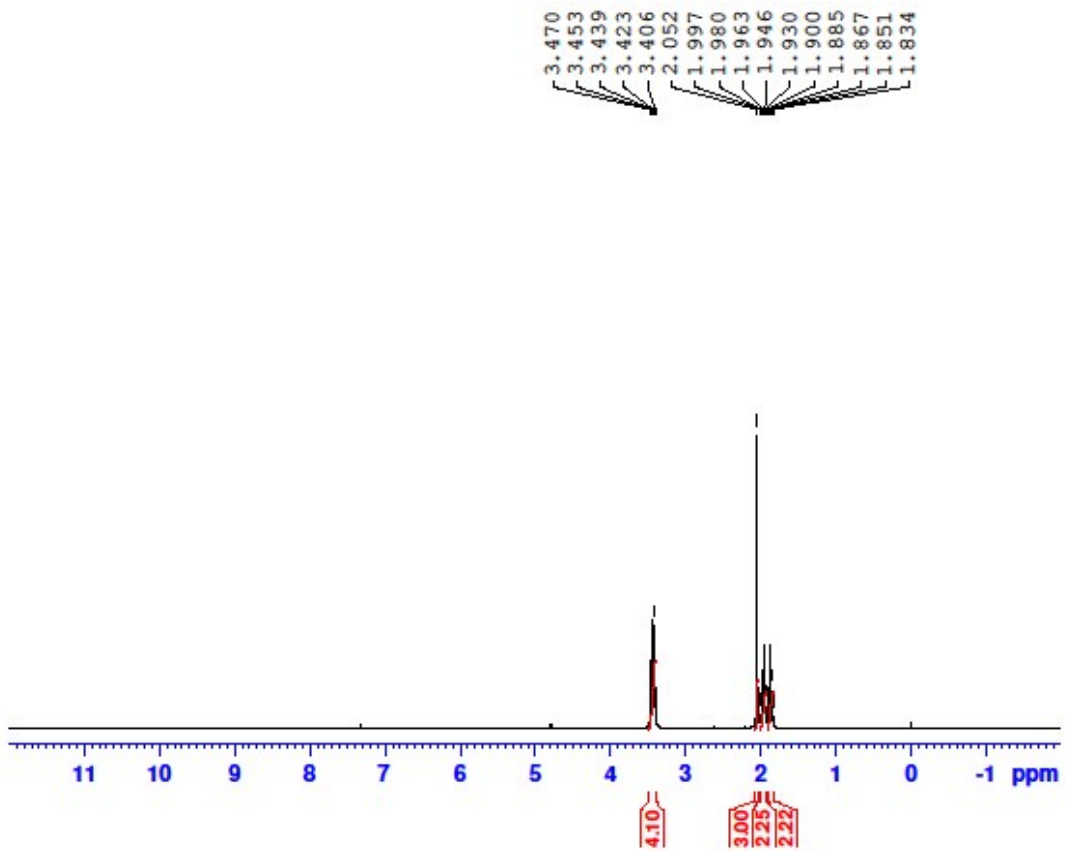

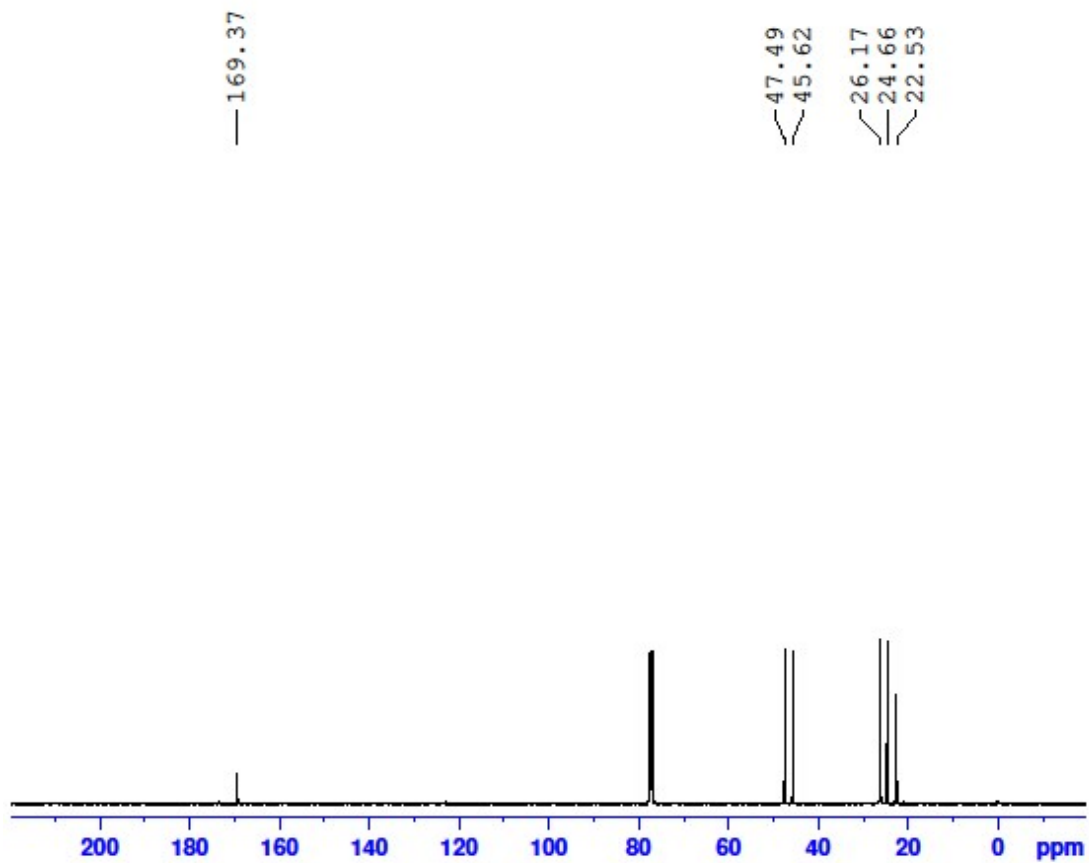

**Figure 23.**  $^1\text{H}$  (400 MHz) and  $^{13}\text{C}$  (100 MHz) NMR spectra of **3v** in  $\text{DMSO-d}_6$ .

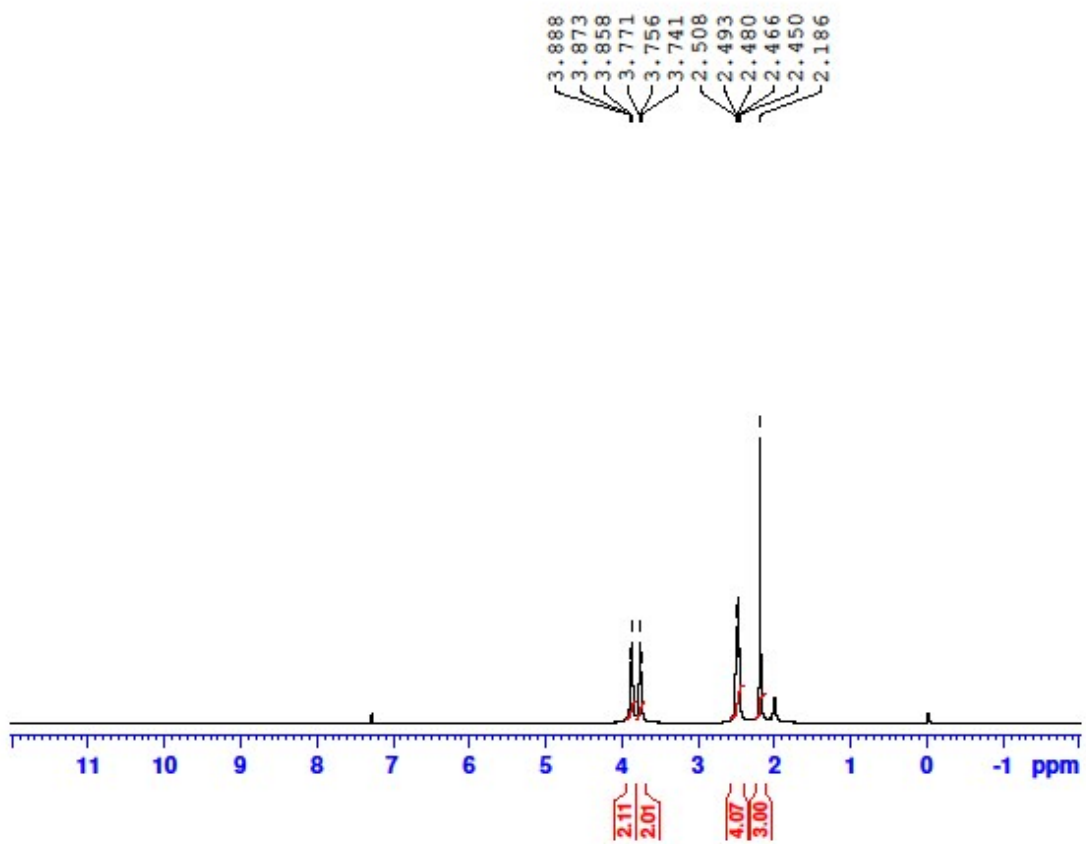

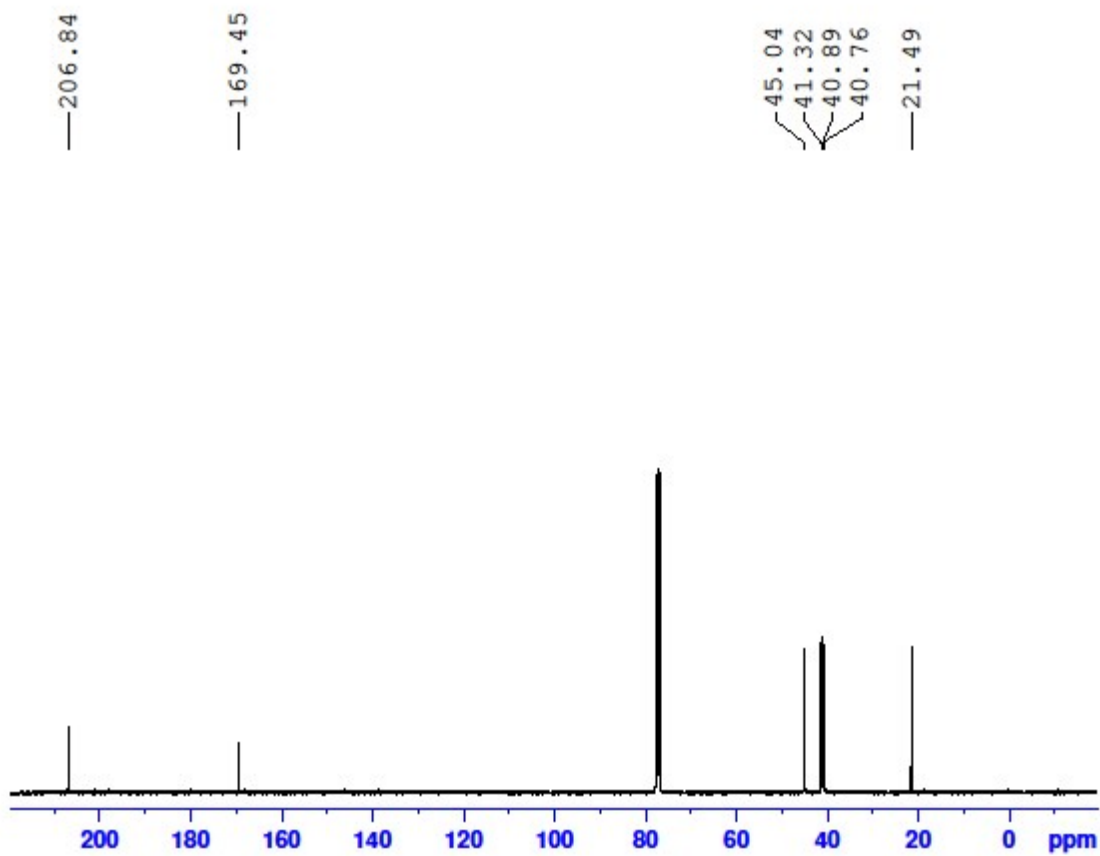

**Figure 24.**  $^1\text{H}$  (400 MHz) and  $^{13}\text{C}$  (100 MHz) NMR spectra of **3w** in  $\text{DMSO-d}_6$ .

## 6. References

1. N. Vodnala, R. Gujjarappa, C. K. Hazra, D. Kaldhi, A. K. Kabi, U. Beifuss and C. C. Malakar, *Adv. Synth. Catal.*, 2019, **361**, 135.
2. W. Su and H. Cai, *J. Chem. Res.*, 2004, **6**, 414.
3. M. D. H. Bhuiyan, A. B. Mahon, P. Jensen, J. K. Clegg and A. C. Try, *Eur. J. Org. Chem.*, 2009, 687.
4. F. Wang, H. Liu, H. Fu, Y. Jiang and Y. Zhao, *Adv. Synth. Catal.*, 2009, **351**, 246.
5. R. Moreno-Corral, H. Höpfl, L. Machi-Lara and K. O. Lara, *Eur. J. Org. Chem.*, 2011, 2148.
6. M. Zhu and N. Zheng, *Synthesis*, 2011, 2223.
7. B. Gnanaprakasam and D. Milstein, *J. Am. Chem. Soc.*, 2011, **133**, 1682.
8. R. S. Alekseyev, A. V. Kurkin, and M. A. Yurovskaya, *Chem. Heterocycl. Compd.*, 2011, **47**, 584.
